# Supplementary material for: Design, Synthesis, and In Vitro Evaluation of Benzofuro[3,2-c]Quinoline Derivatives as Potential Antileukemia Agents
Source: MDPI journal article supplement (doi:10.3390/molecules25010203), 2020-01-03

## Supporting Information

# Design, synthesis and in vitro evaluation of benzofuro[3,2-*c*]quinoline derivatives as potential antileukemia agents

Ying Lin<sup>a</sup>, Dong Xing<sup>a</sup>, Wen-Biao Wu<sup>d,e</sup>, Gao-Ya Xu<sup>d,e</sup>, Li-Fang Yu<sup>a</sup>, Jie Tang<sup>a,c</sup>, Yu-Bo Zhou<sup>d,e</sup>, Jia Li<sup>b,d,e\*</sup> and Fan Yang<sup>a,\*</sup>

<sup>a</sup> Shanghai Engineering Research Center of Molecular Therapeutics and New Drug Development, School of Chemistry and Molecular Engineering, East China Normal University, Shanghai, 200062, PR China; [fyang@chem.ecnu.edu.cn](mailto:fyang@chem.ecnu.edu.cn).

<sup>b</sup> Open Studio for Druggability Research of Marine Natural Products, Pilot National Laboratory for Marine Science and Technology (Qingdao), 1 Wenhai Road, Aoshanwei, Jimo, Qingdao, 266237, PR China.

<sup>c</sup> Shanghai Greenchem & Biotech Co., Ltd., Shanghai, 200062, PR China.

<sup>d</sup> National Center for Drug Screening, Shanghai Institute of Material Medica, Chinese Academy of Science, Shanghai, 201203, PR China; [jli@simmm.ac.cn](mailto:jli@simmm.ac.cn).

<sup>e</sup> University of Chinese Academy of Sciences, No. 19A Yuquan Road, Beijing, 100049, PR China.

\* Correspondence: [fyang@chem.ecnu.edu.cn](mailto:fyang@chem.ecnu.edu.cn), [jli@simmm.ac.cn](mailto:jli@simmm.ac.cn); Tel.: +86-21-62232764 (F.Y.), +86-21-50806600 (J. L.)

Received: date; Accepted: date; Published: date

## 1. Condition Optimization on the demethylation/cyclization

**Table S1** Condition optimization on the demethyl-cyclization (one pot)

| Entry | Condition             | Tempo<br>( °C) | Time<br>(h) | Yield<br>of <b>2a</b> (%) |
|-------|-----------------------|----------------|-------------|---------------------------|
| 1     | 48% HBr/AcOH          | reflux         | 8           | no product <sup>1</sup>   |
| 2     | HI                    | reflux         | 12          | no product <sup>1</sup>   |
| 3     | BBr <sub>3</sub> /DCM | reflux         | 8           | no product <sup>1</sup>   |
| 4     | Pyridine              | reflux         | 5           | no reaction <sup>2</sup>  |

<sup>1</sup> demethylation occurs smoothly while further cyclized **2a** could not obtained; <sup>2</sup> only starting material **1a**

**Table S2** Condition optimization on the cyclization (stepwise) <sup>1</sup>

| Entry | Condition              | Tempo<br>( °C) | Time<br>(h) | Yield<br>of <b>2a</b> (%) |
|-------|------------------------|----------------|-------------|---------------------------|
| 1     | AcOH/EtOH              | reflux         | 6           | no reaction               |
| 2     | Pyridine               | reflux         | 10          | no reaction               |
| 3     | KOt-Bu/ <i>t</i> -BuOH | reflux         | 8           | no reaction               |
| 4     | NaH/DMF                | 100            | 7           | no reaction               |

<sup>1</sup> demethylation of **1a** through BBr<sub>3</sub>/DCM at room temperature, then next cyclization was optimized.

## 2. Condition Optimization on the cyclization

**Table S3** Condition optimization on the cyclization from **4a** to **2a** <sup>1</sup>

| Entry | Base                            | Solvent                            | Tempo<br>( °C) | % Yield<br>of <b>2a</b> (%) <sup>2</sup> |
|-------|---------------------------------|------------------------------------|----------------|------------------------------------------|
| 1     | NaH                             | MeCN                               | 70             | 82                                       |
| 2     | KOH                             | MeCN                               | 70             | 59                                       |
| 3     | Cs <sub>2</sub> CO <sub>3</sub> | MeCN                               | 70             | 83                                       |
| 4     | KOt-Bu                          | MeCN                               | 70             | 87                                       |
| 5     | Et <sub>3</sub> N               | MeCN                               | 70             | n.r. <sup>3</sup>                        |
| 6     | Pyridine                        | MeCN                               | 70             | n.r.                                     |
| 7     | KOt-Bu                          | CH <sub>3</sub> CH <sub>2</sub> OH | 70             | n.r.                                     |
| 8     | KOt-Bu                          | THF                                | 70             | trace                                    |
| 9     | KOt-Bu                          | <i>t</i> -BuOH                     | 70             | trace                                    |
| 10    | KOt-Bu                          | DMF                                | 70             | 89                                       |
| 11    | KOt-Bu                          | DMF                                | 60             | 88                                       |
| 12    | KOt-Bu                          | DMF                                | 50             | 70                                       |

<sup>1</sup> **4a** (1mmol), base (2 mmol), solvent (5 ml); <sup>2</sup> Isolated yield; <sup>3</sup> no reaction.

### 3. NMR charts

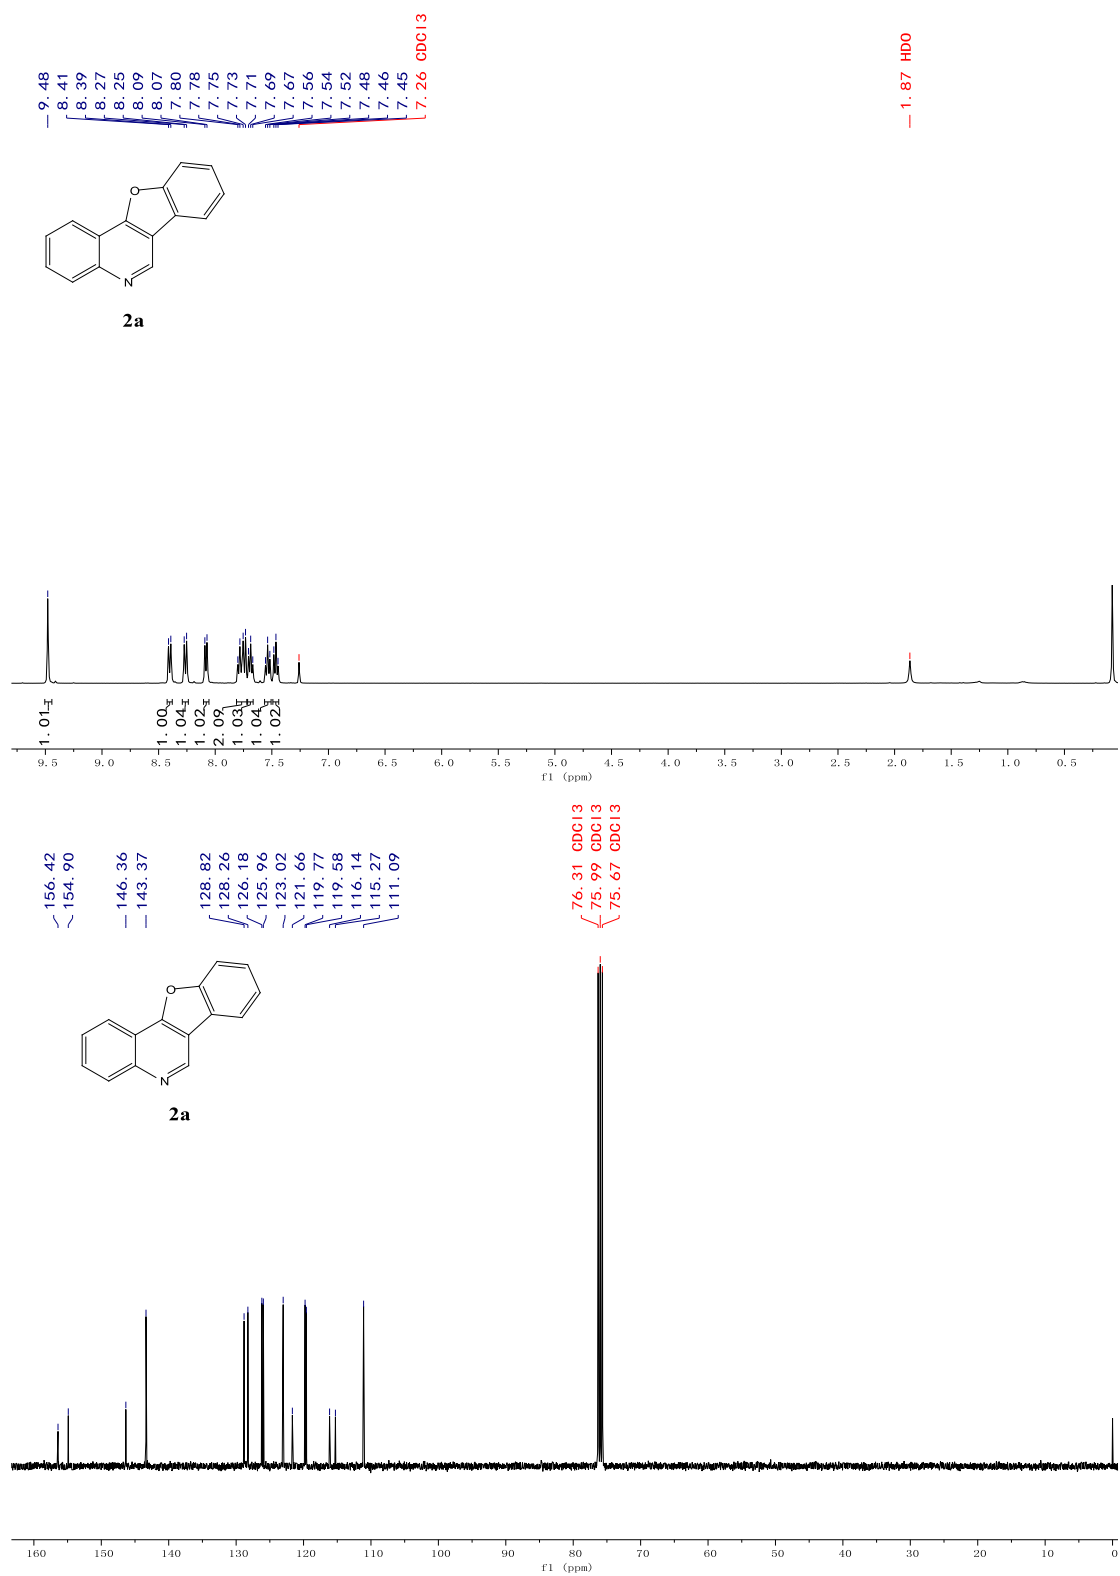

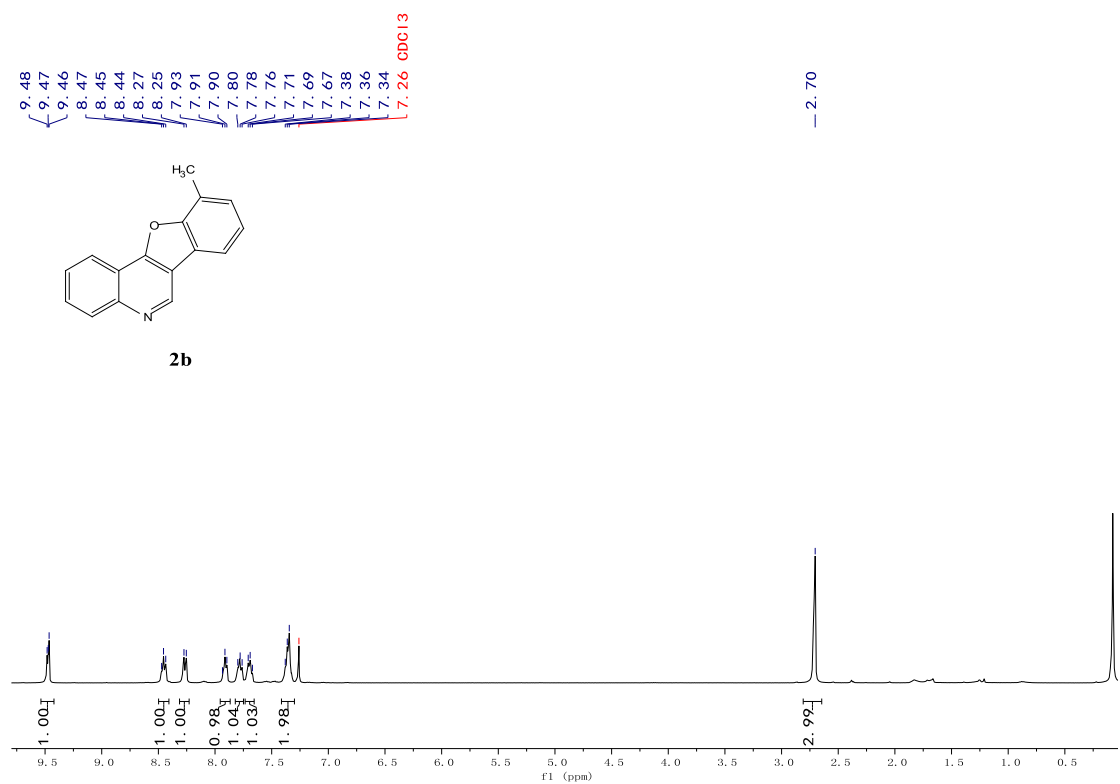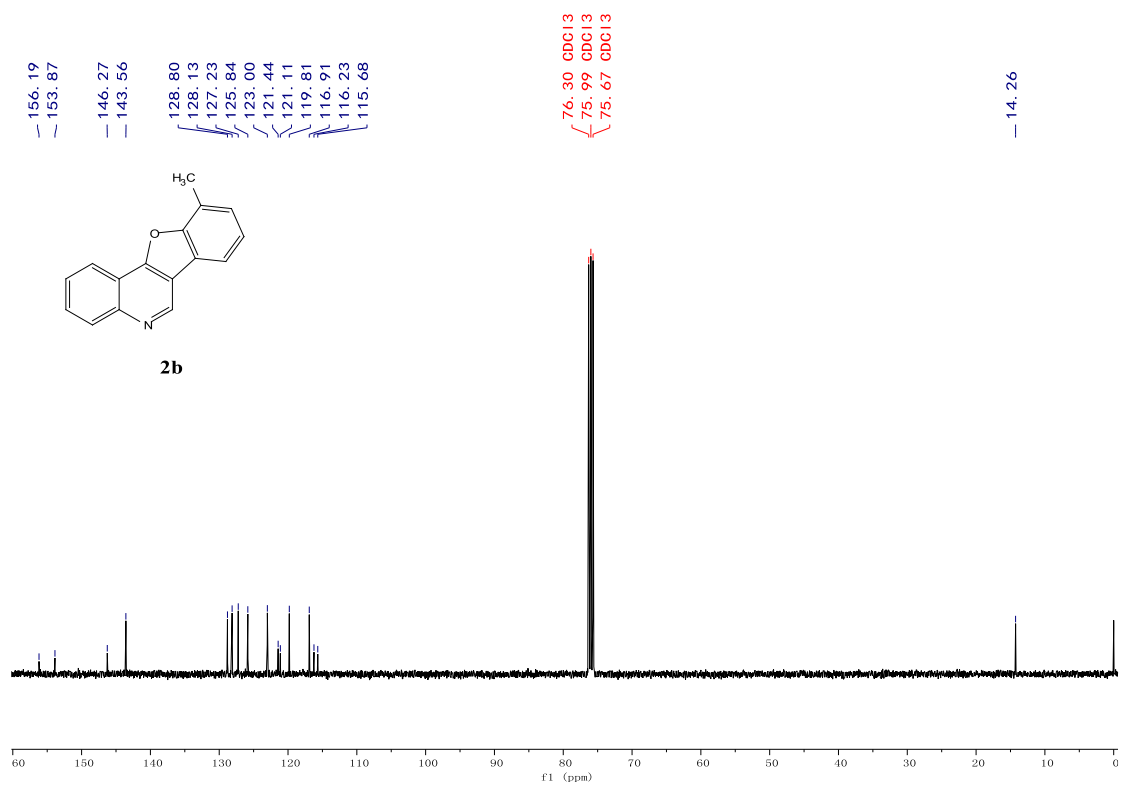

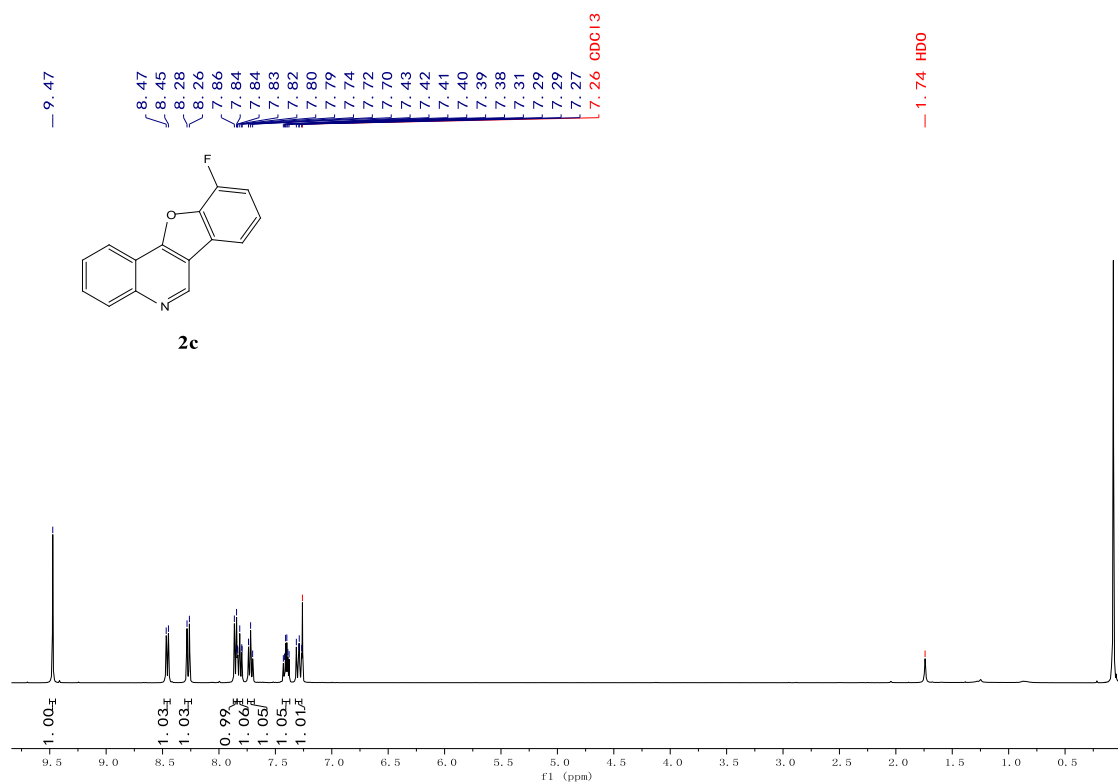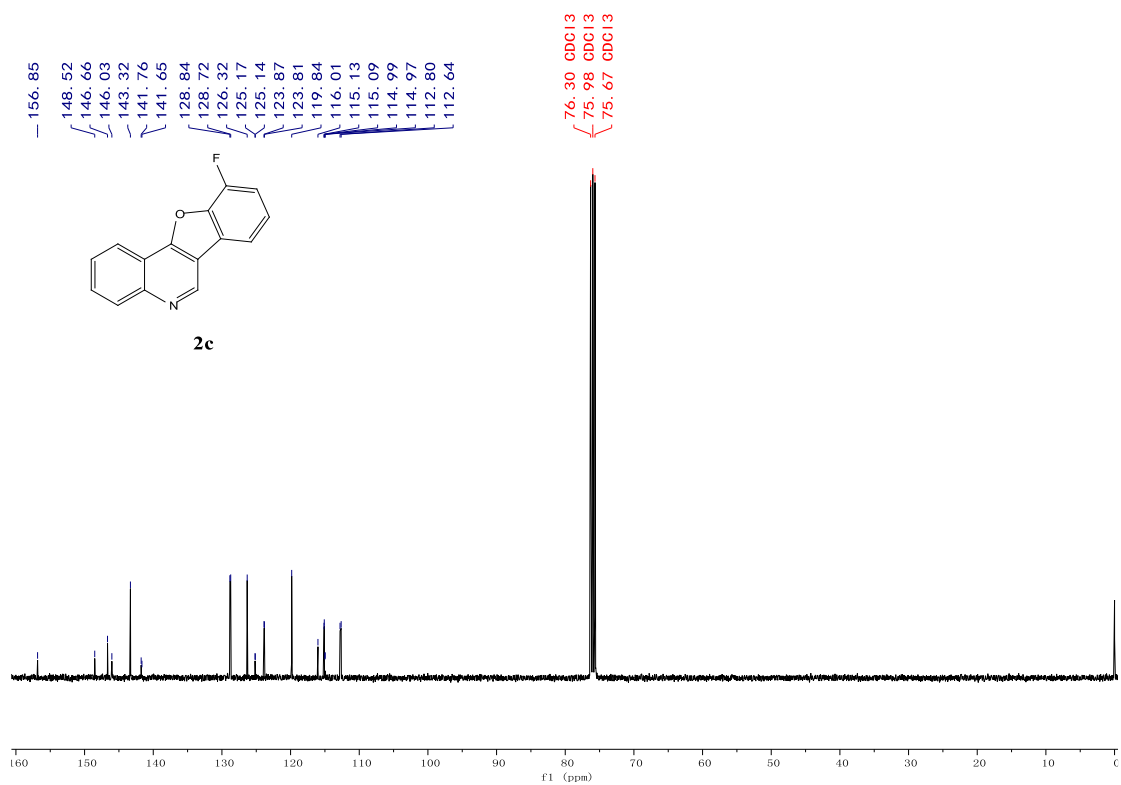

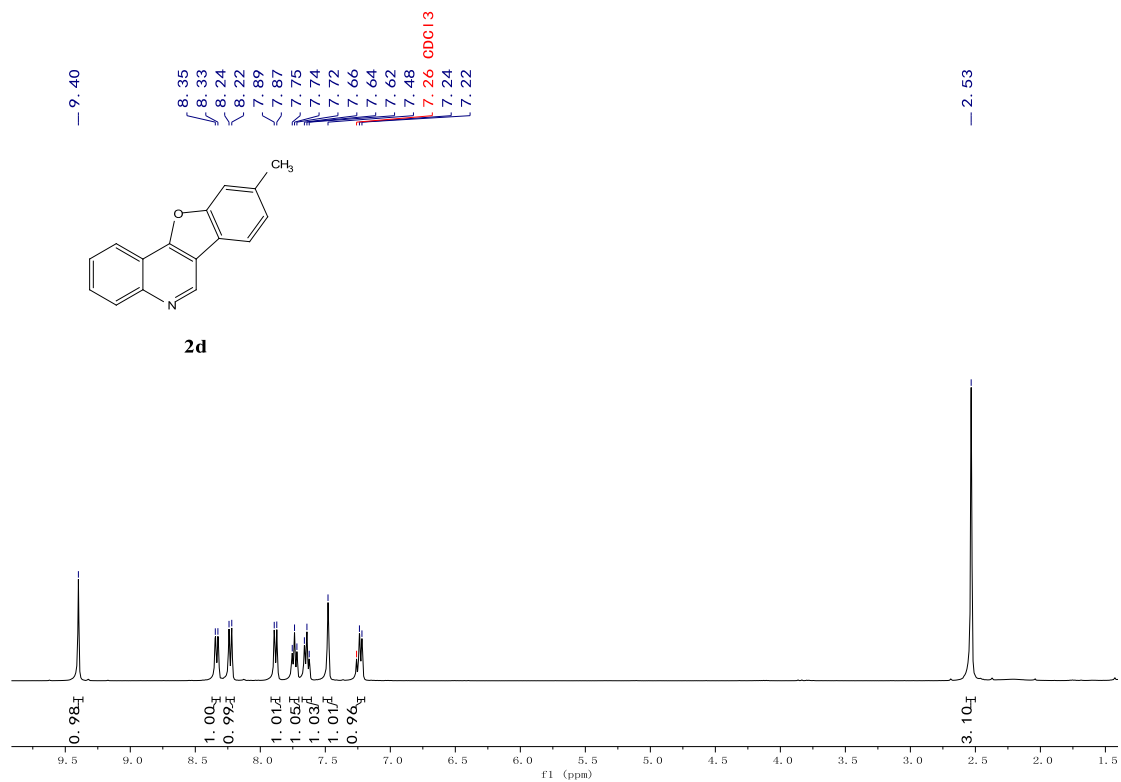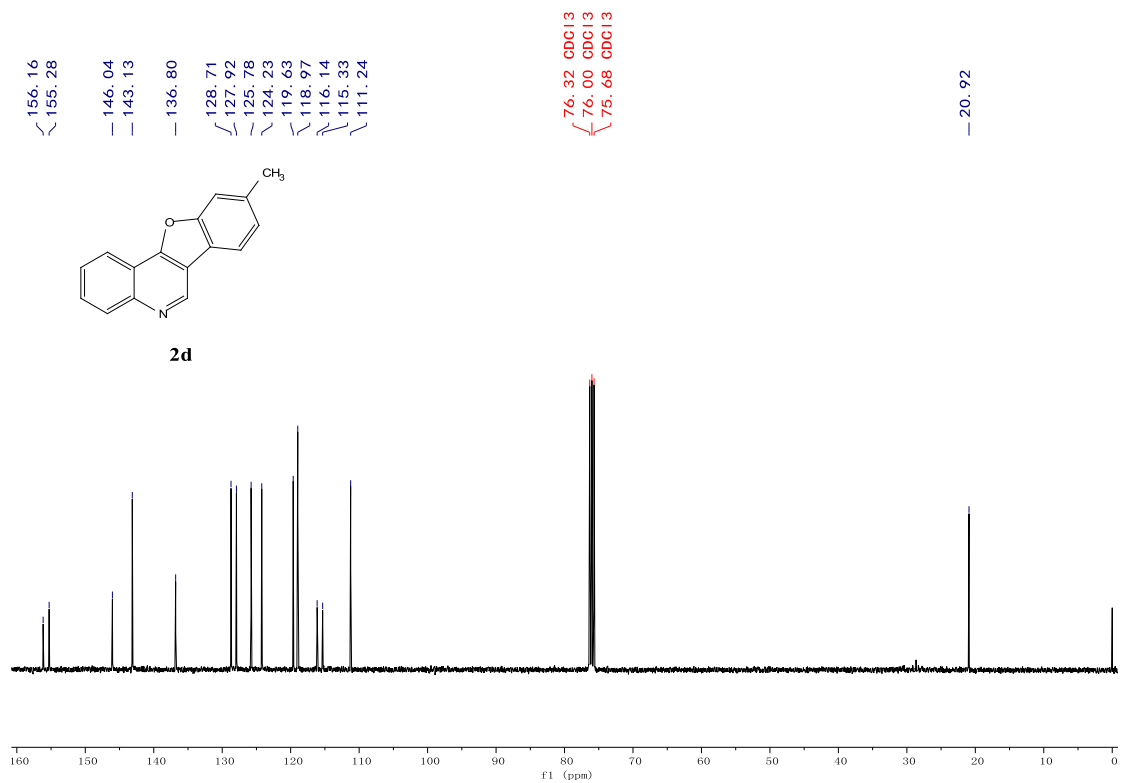

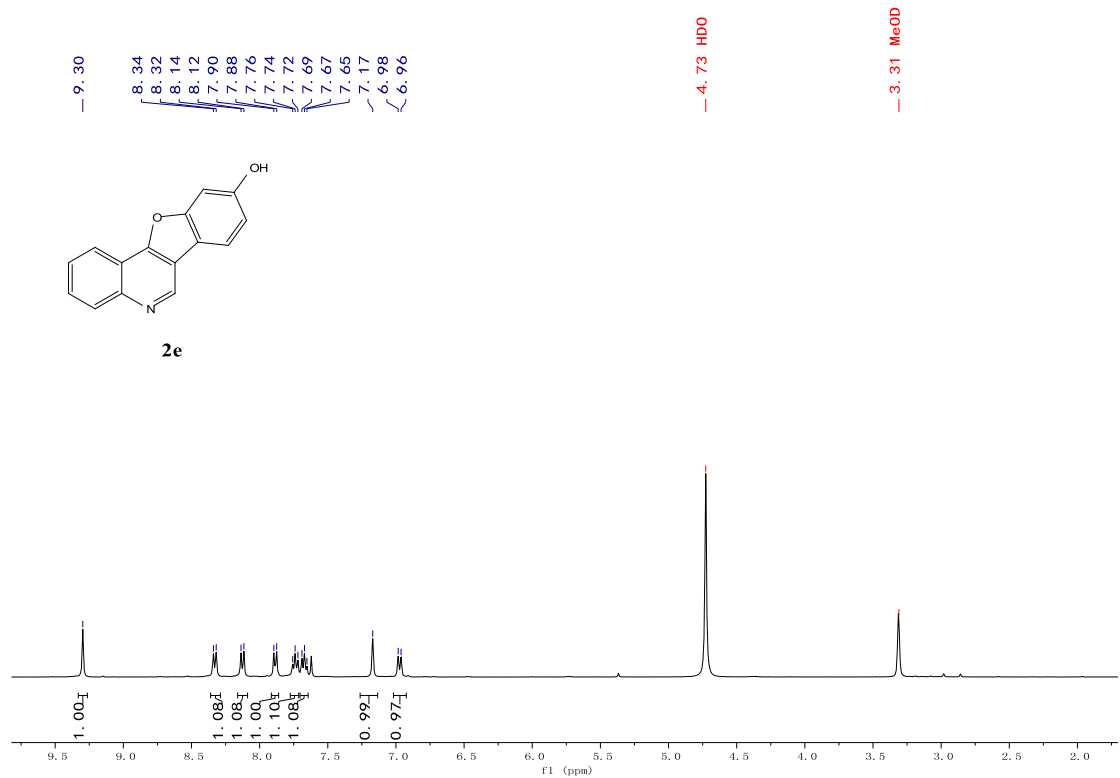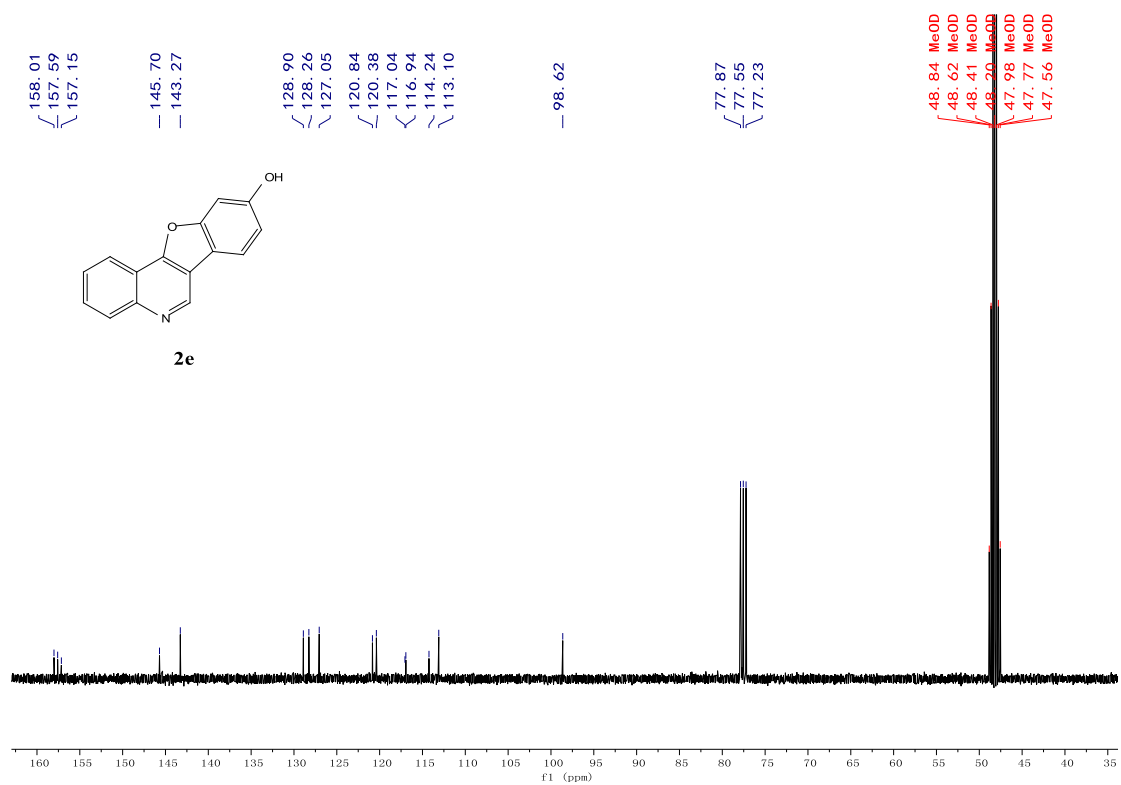

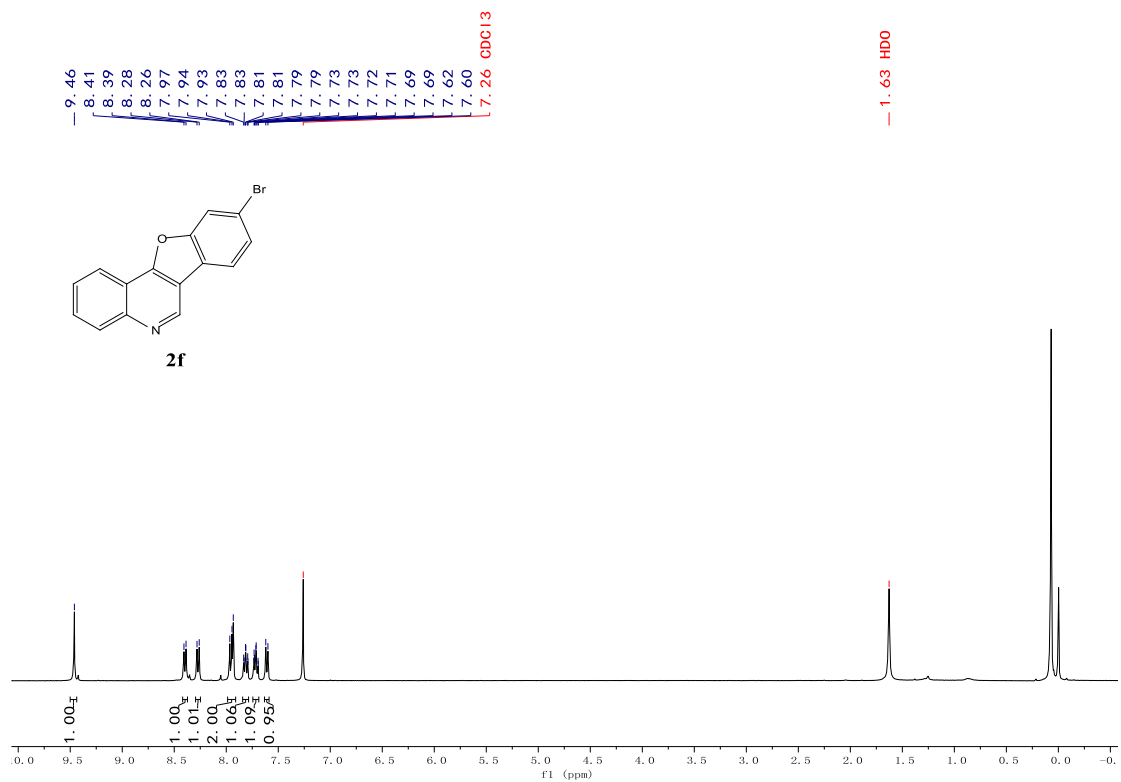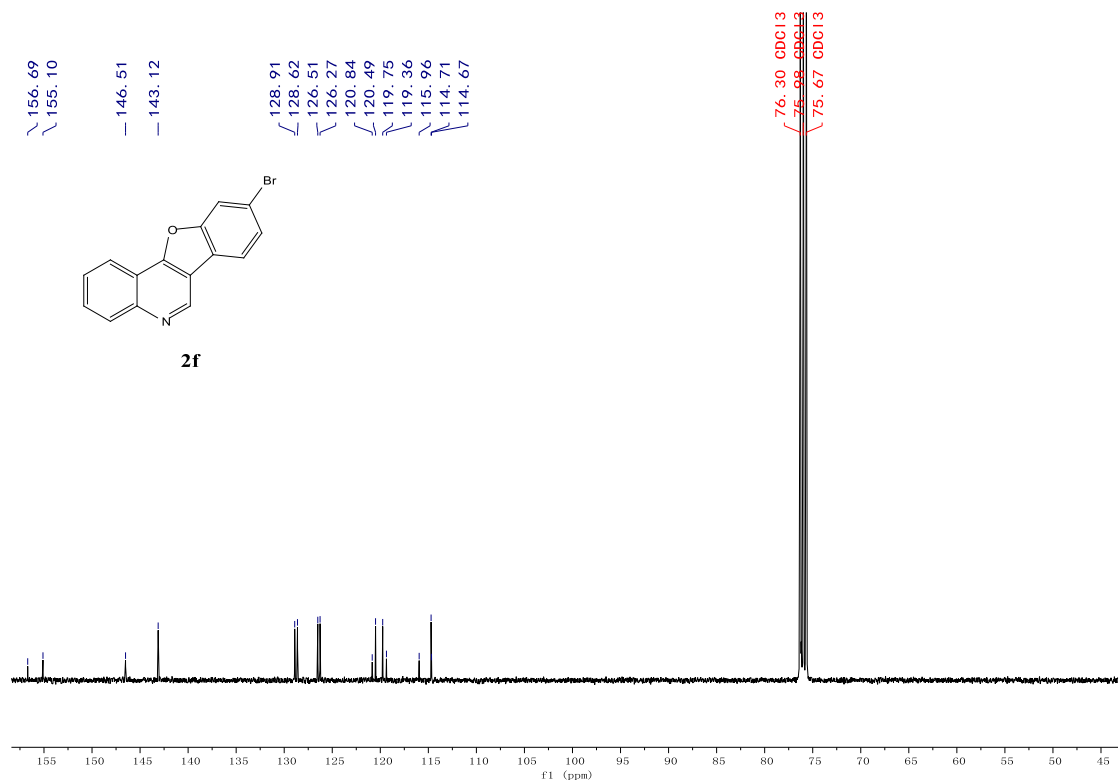

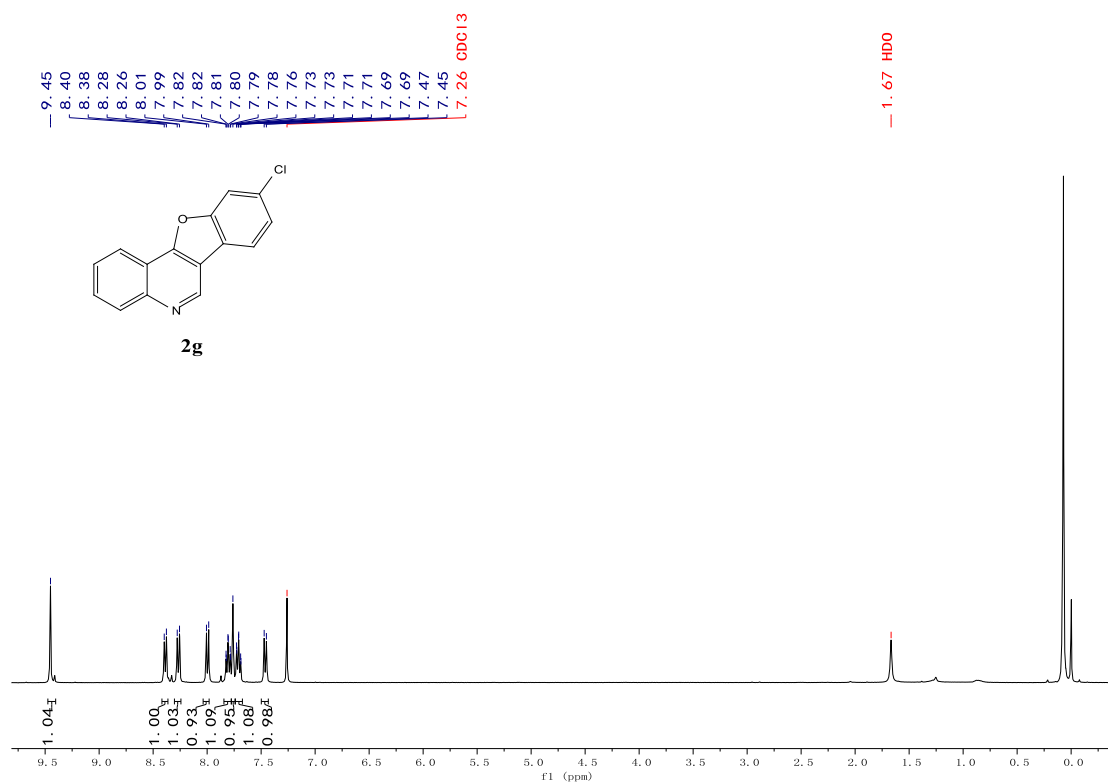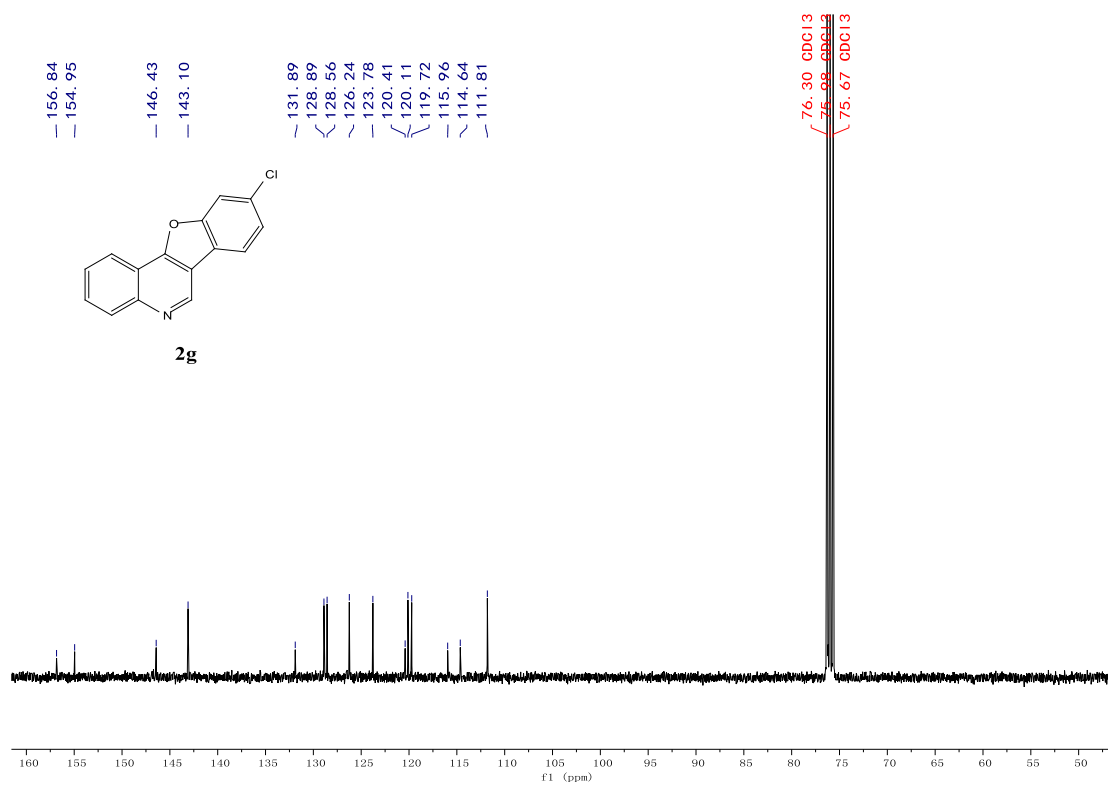

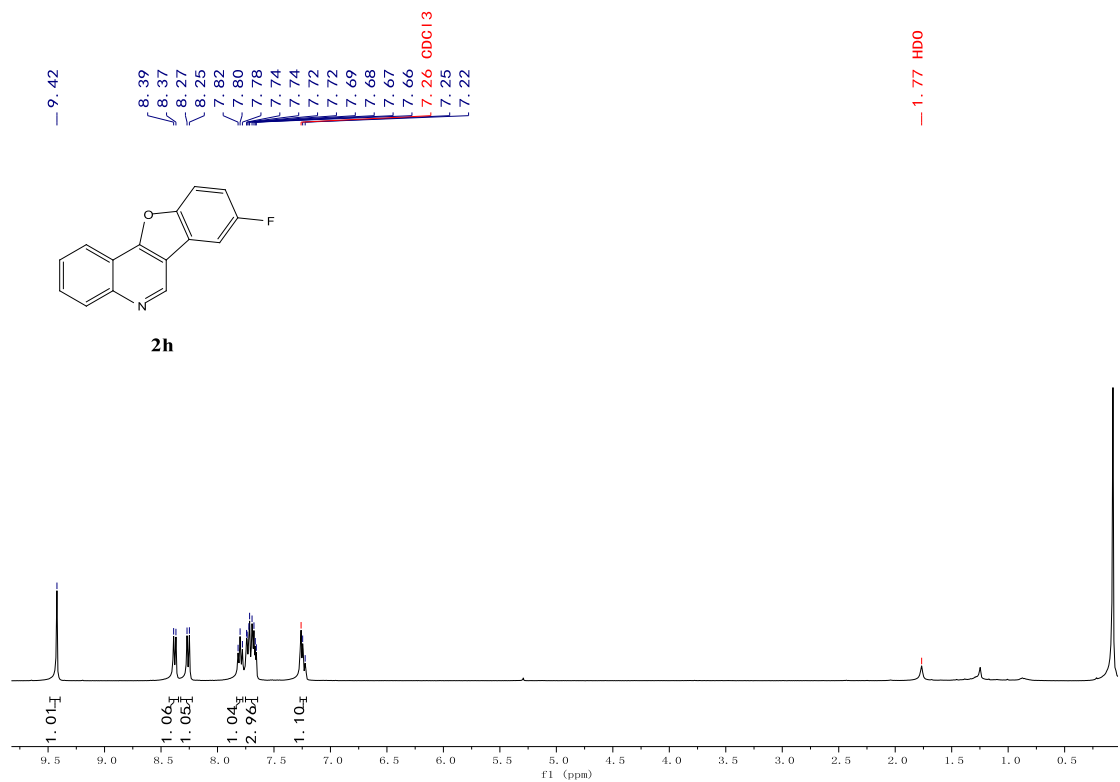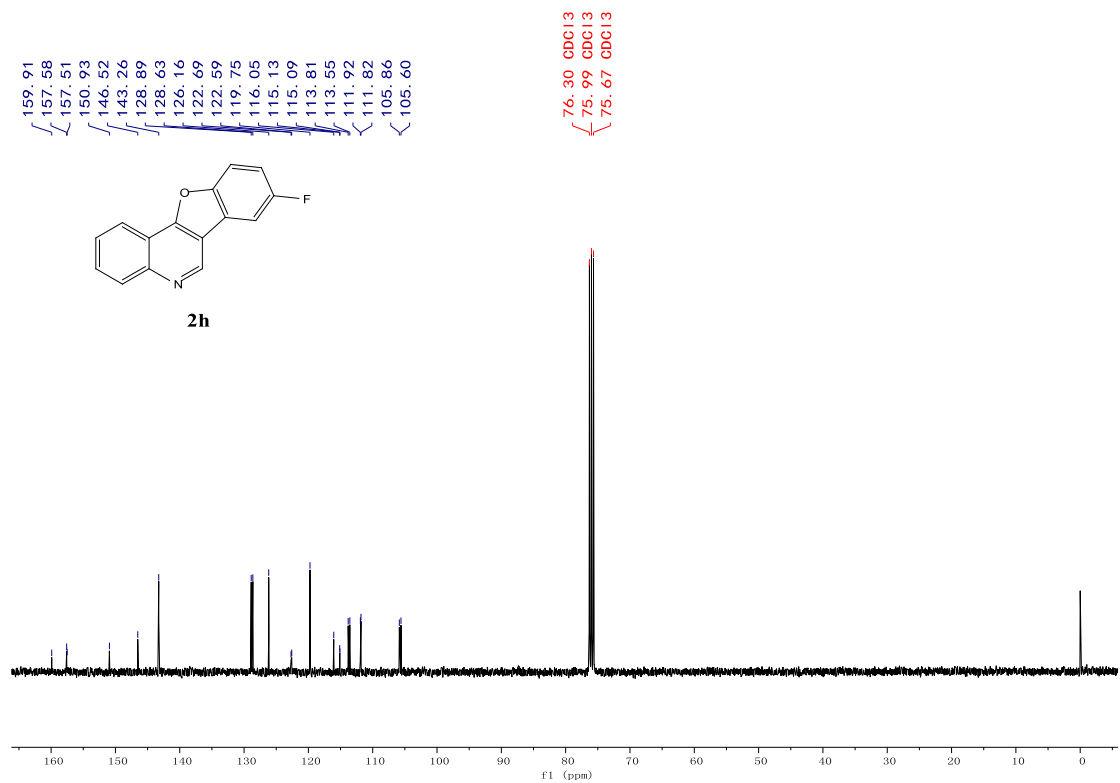

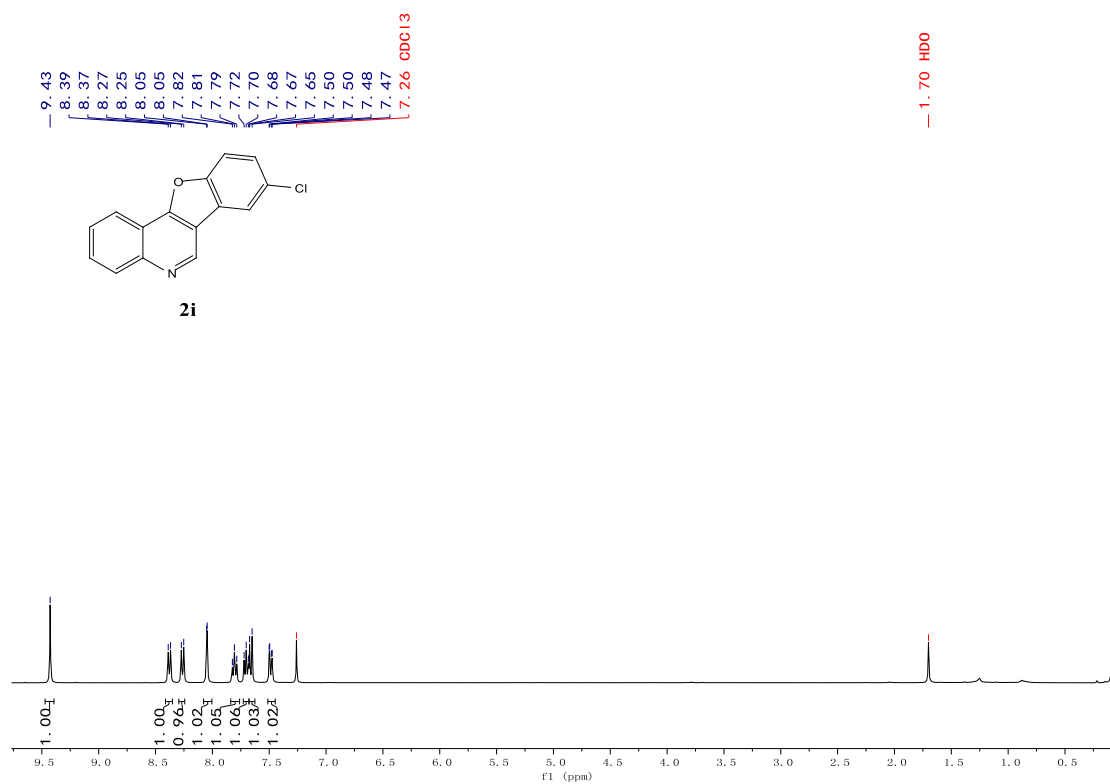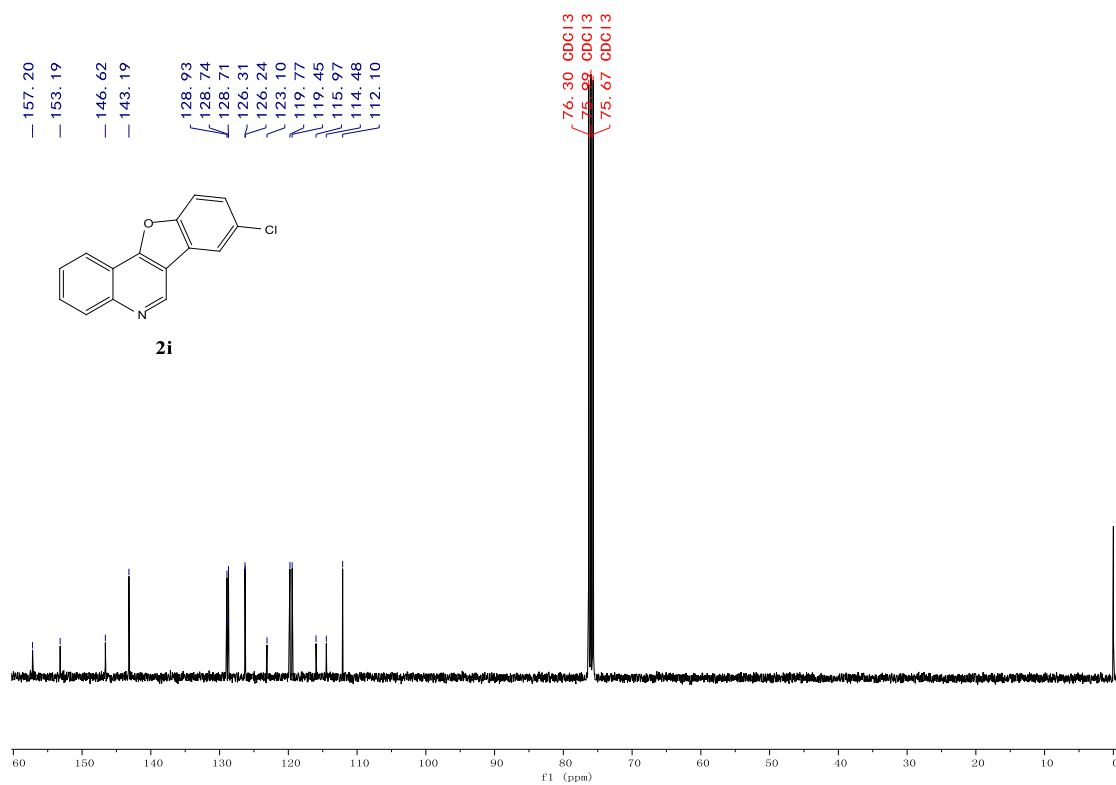

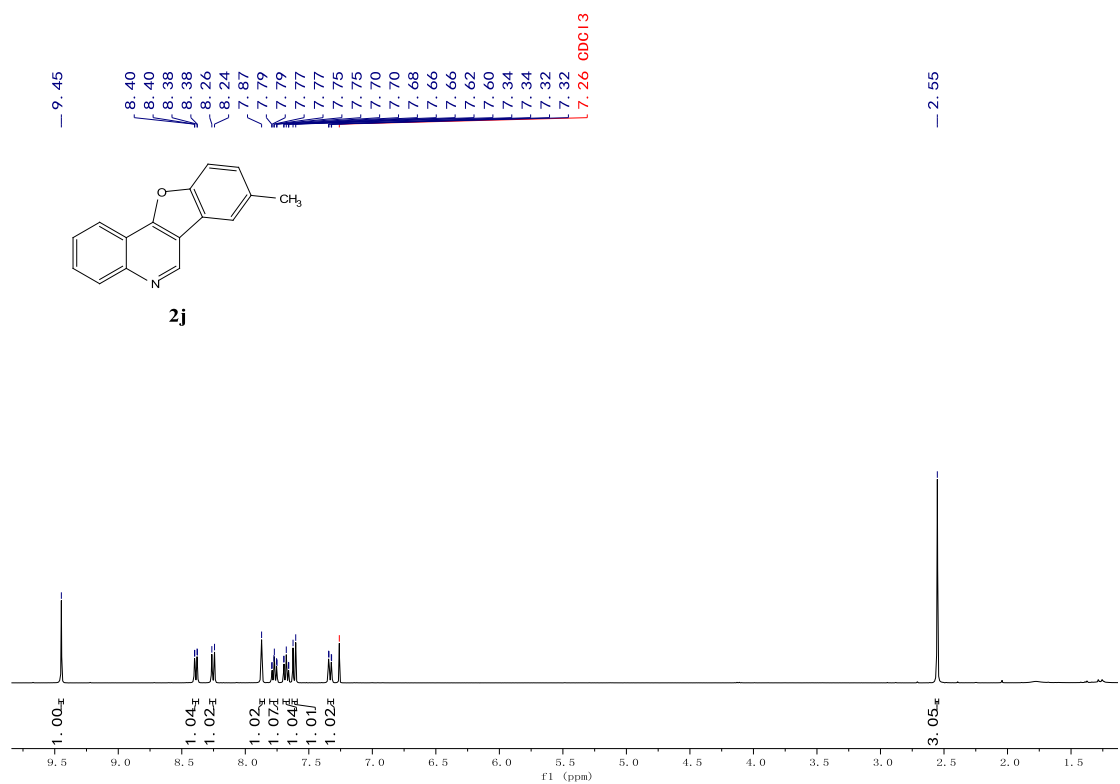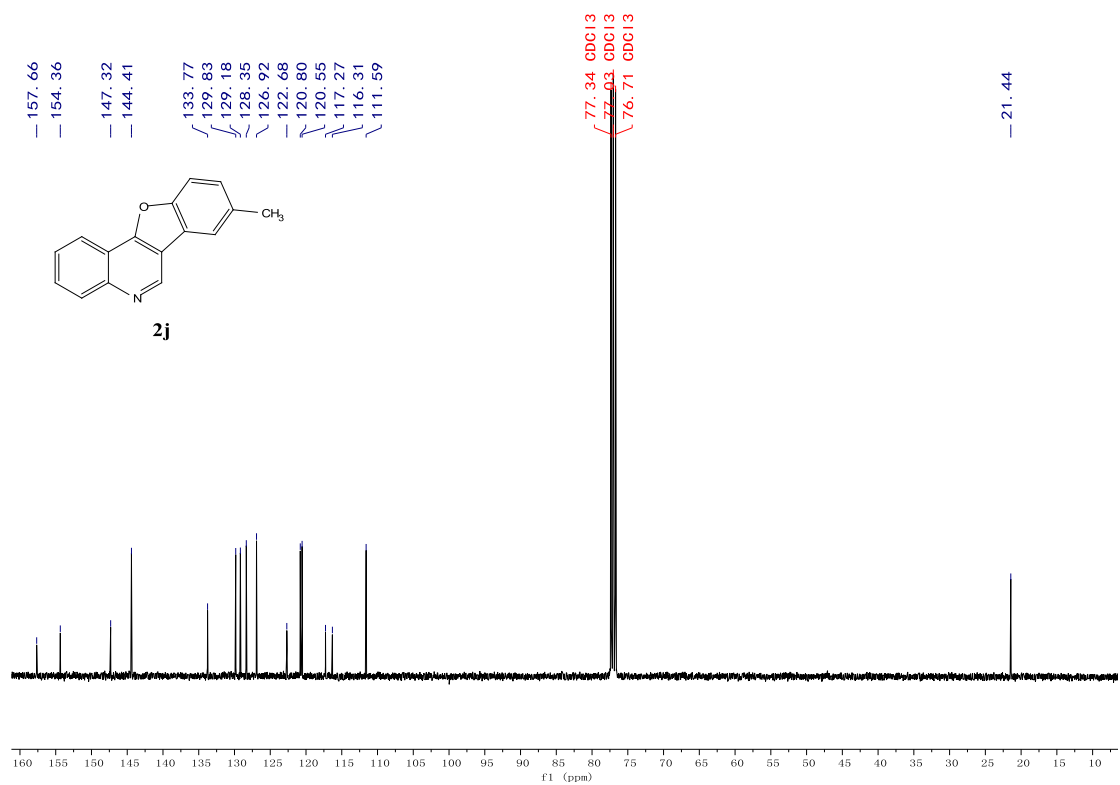

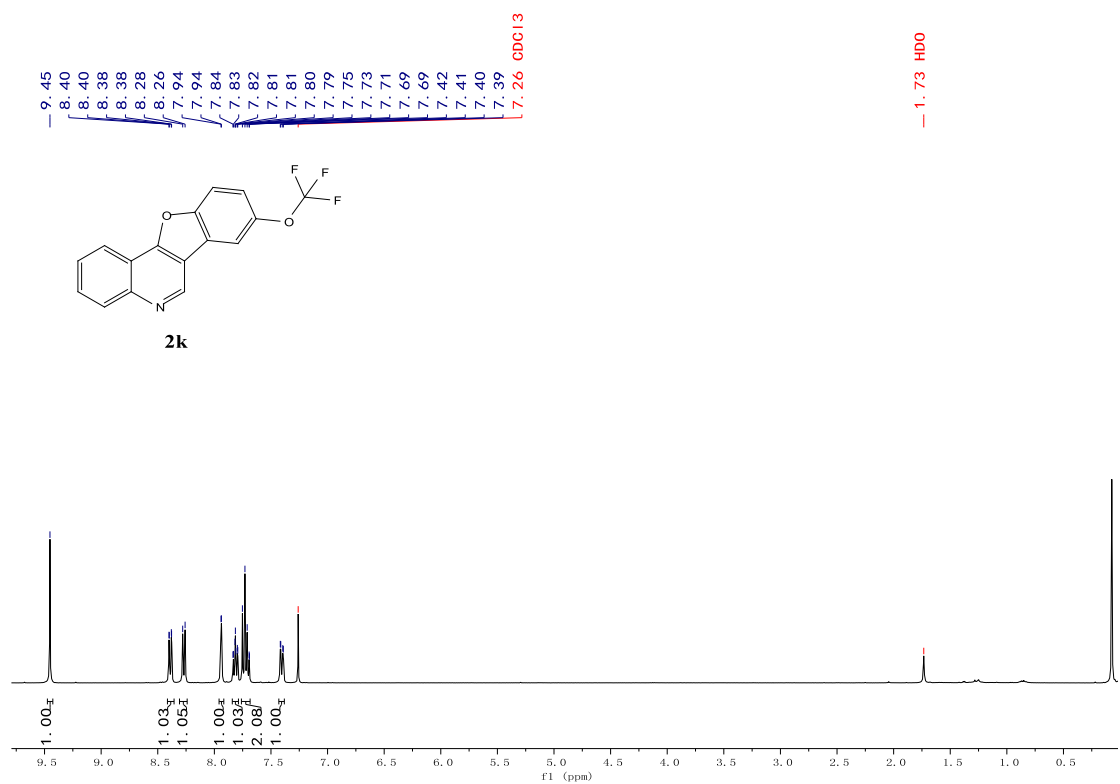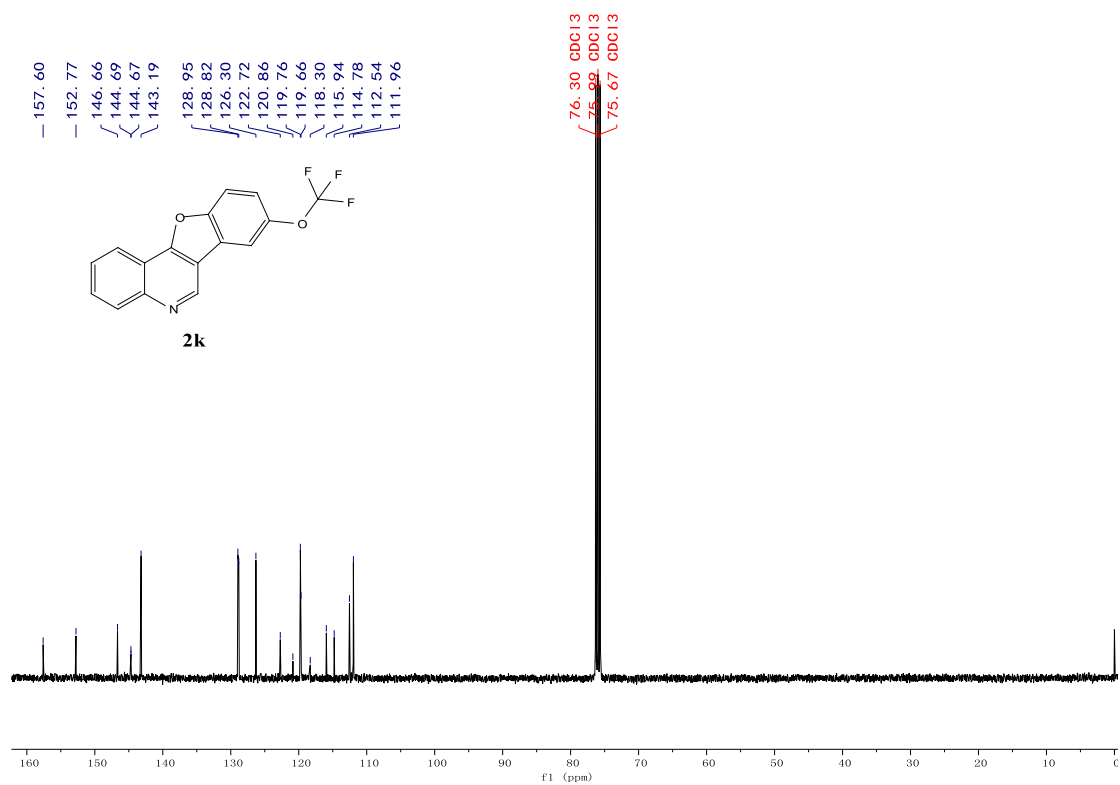

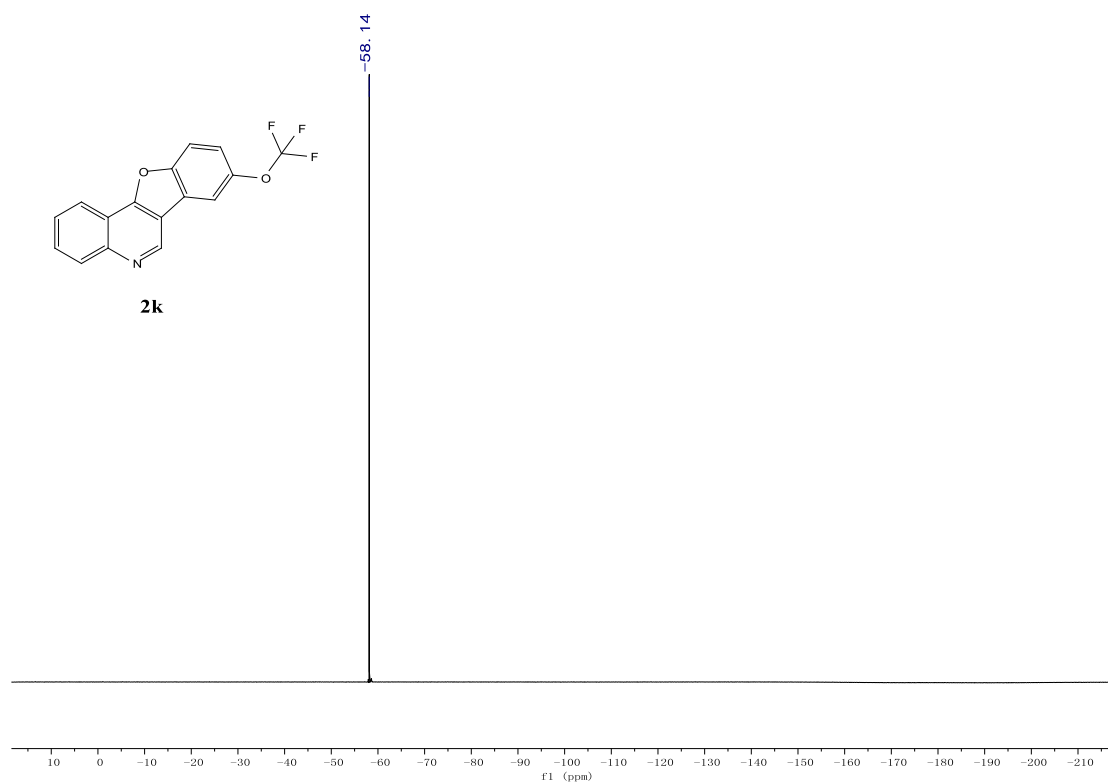

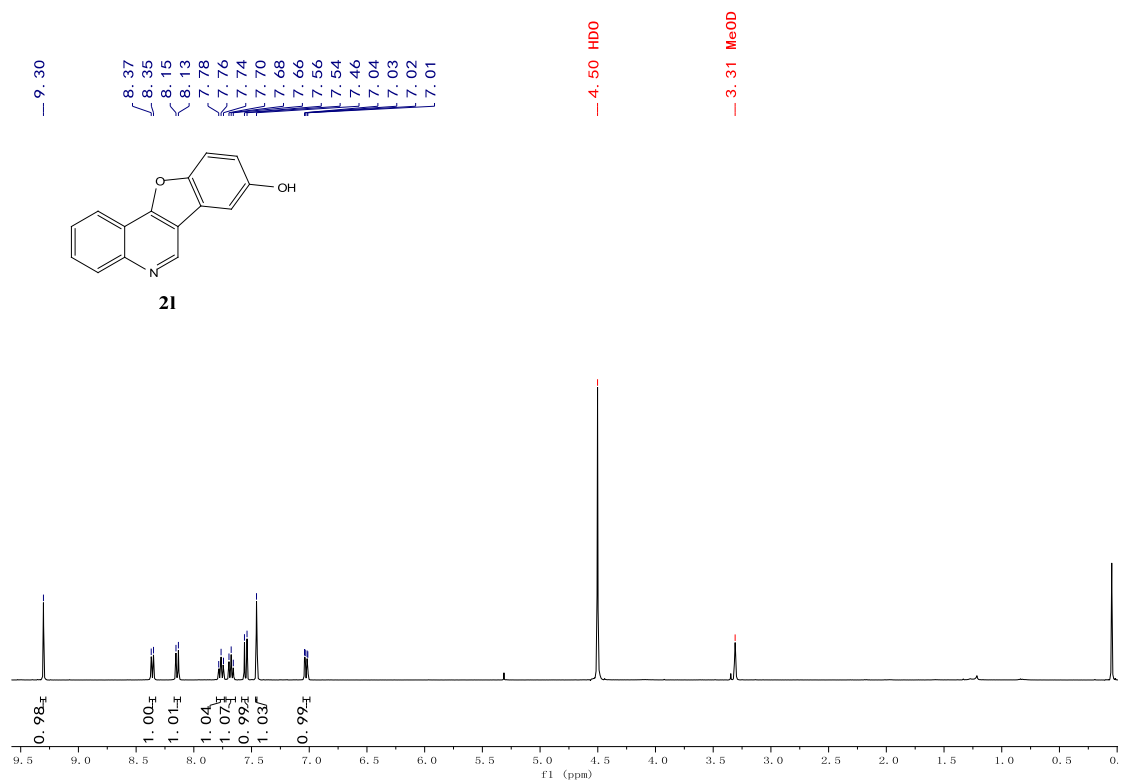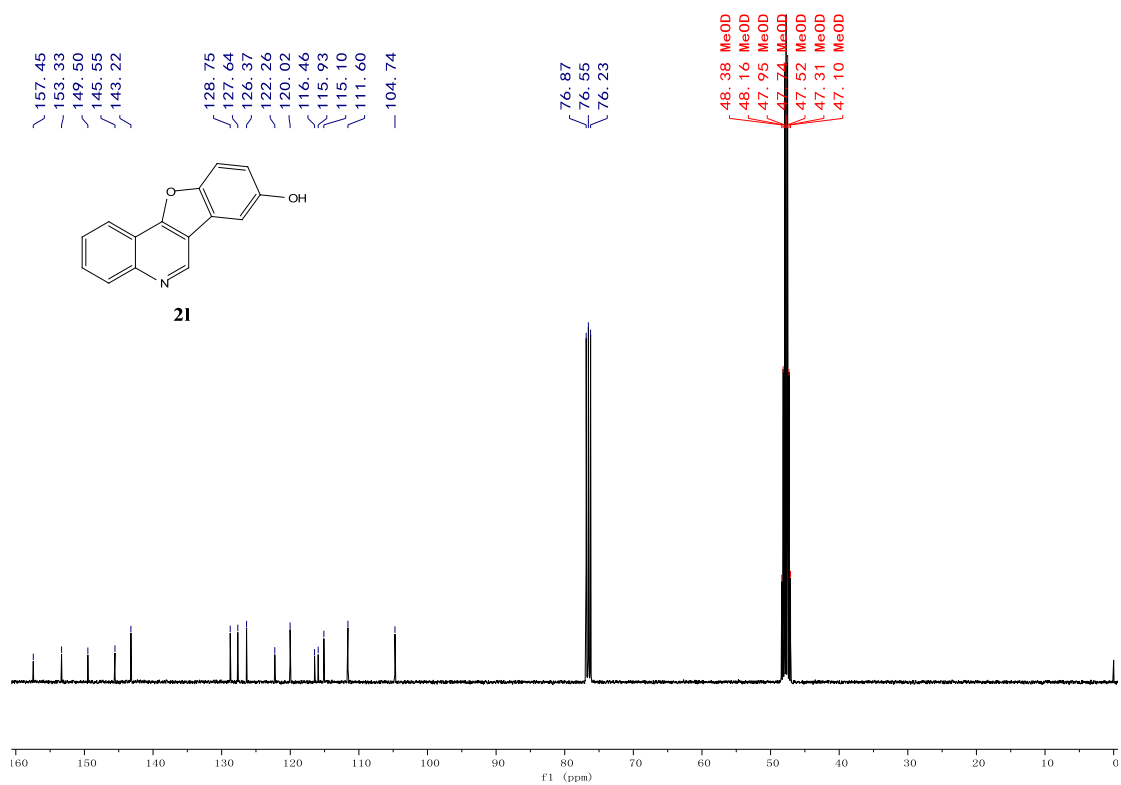

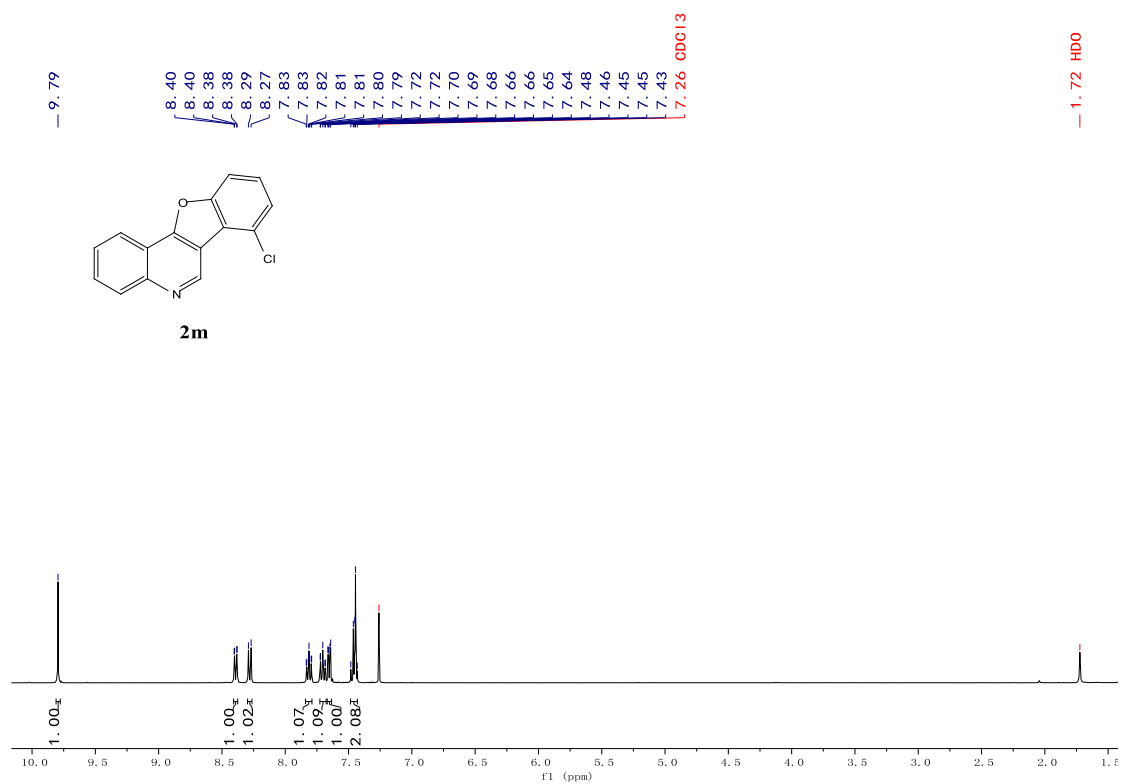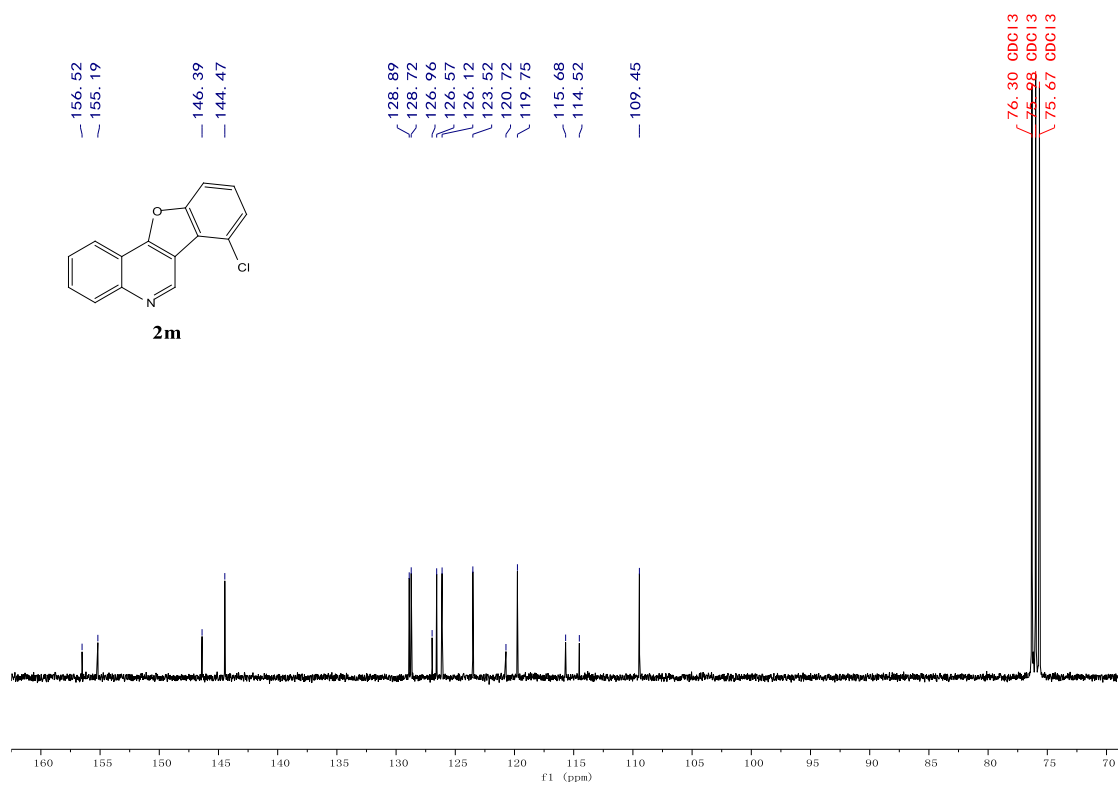

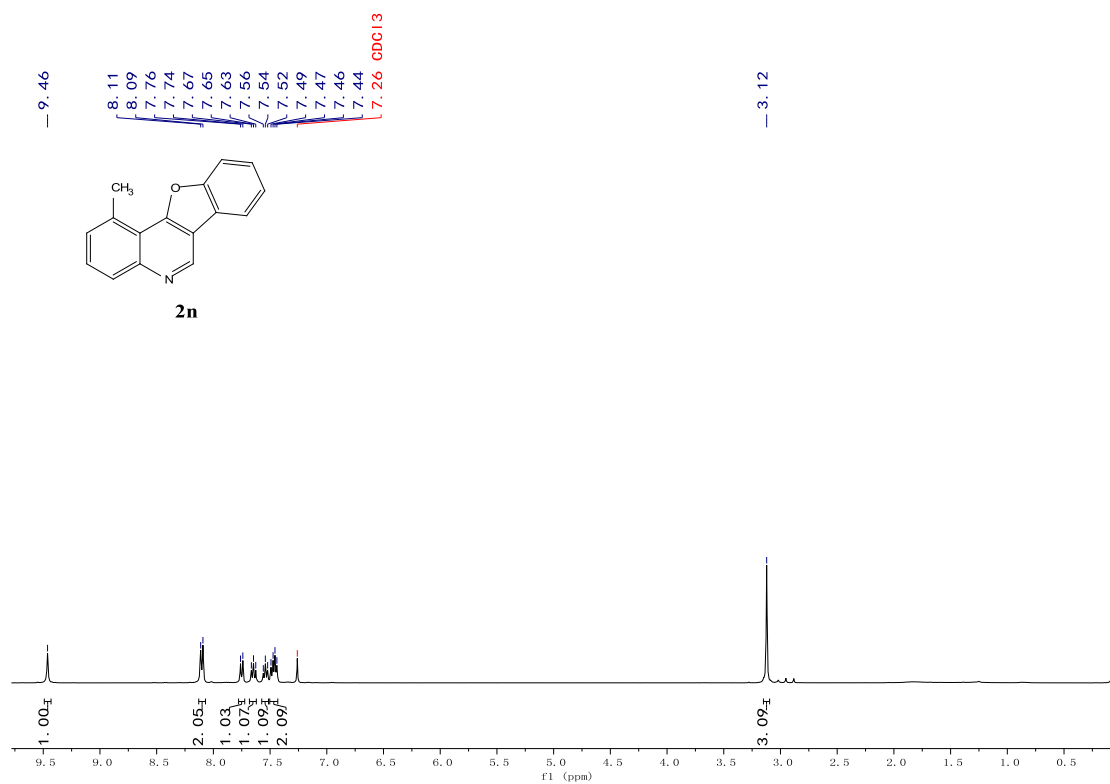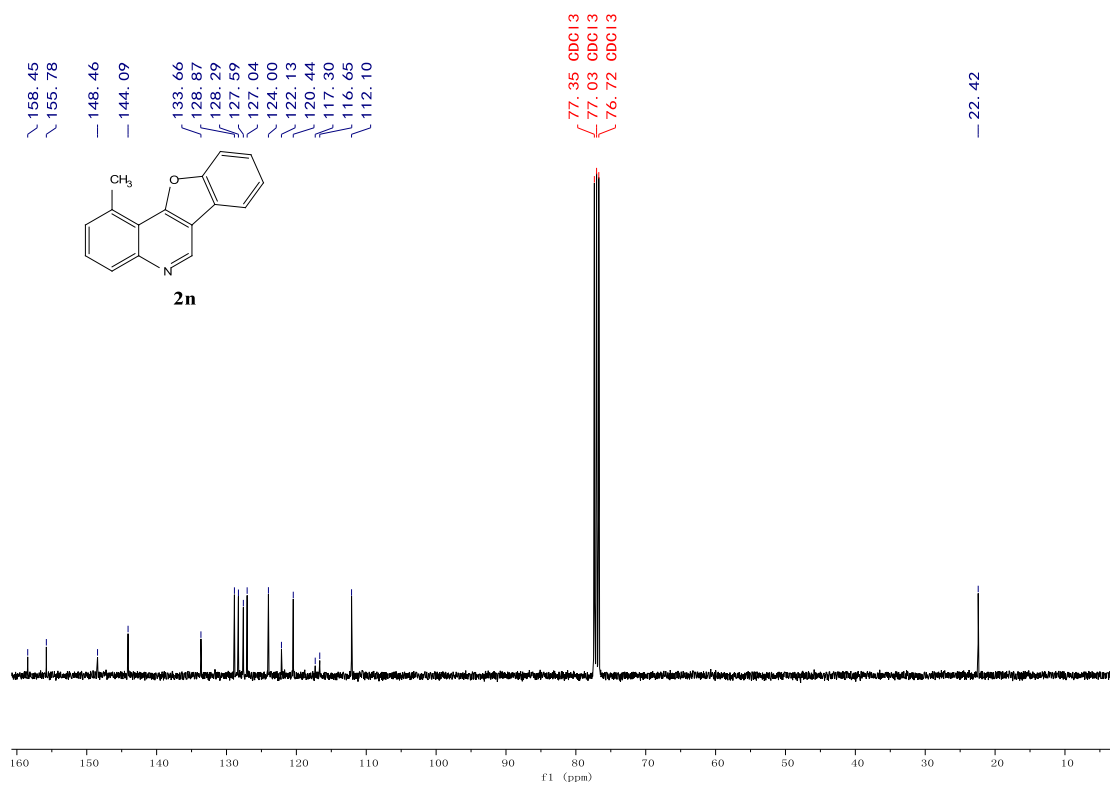

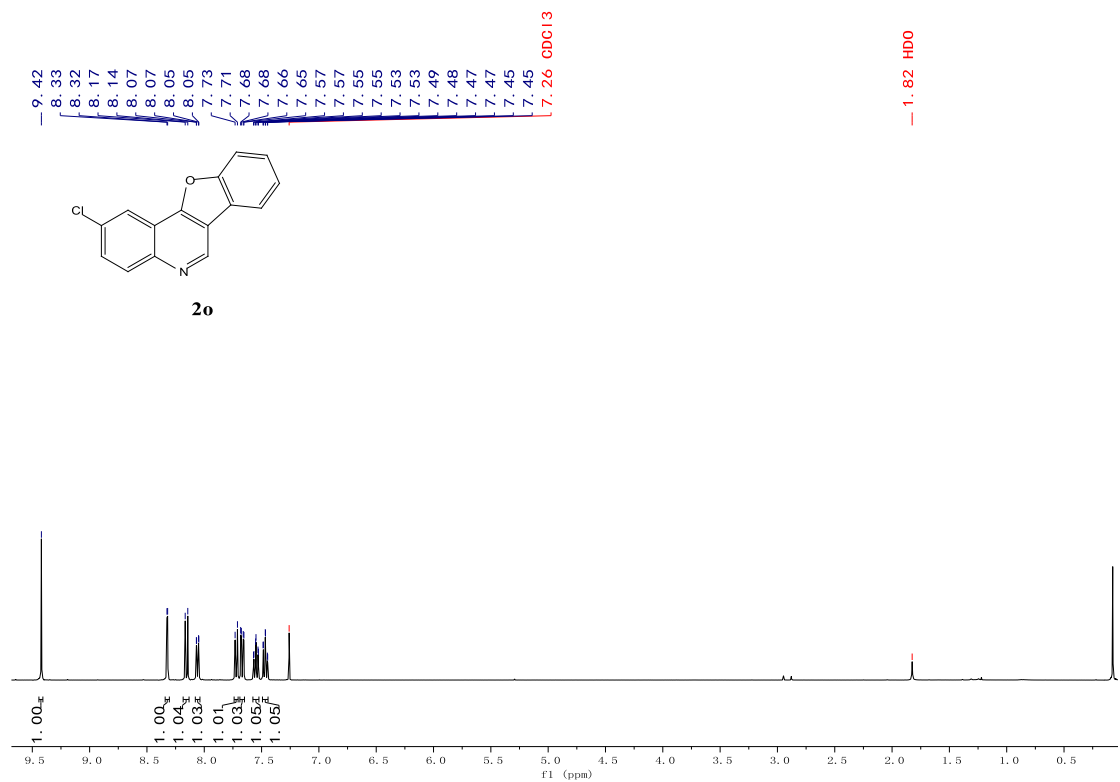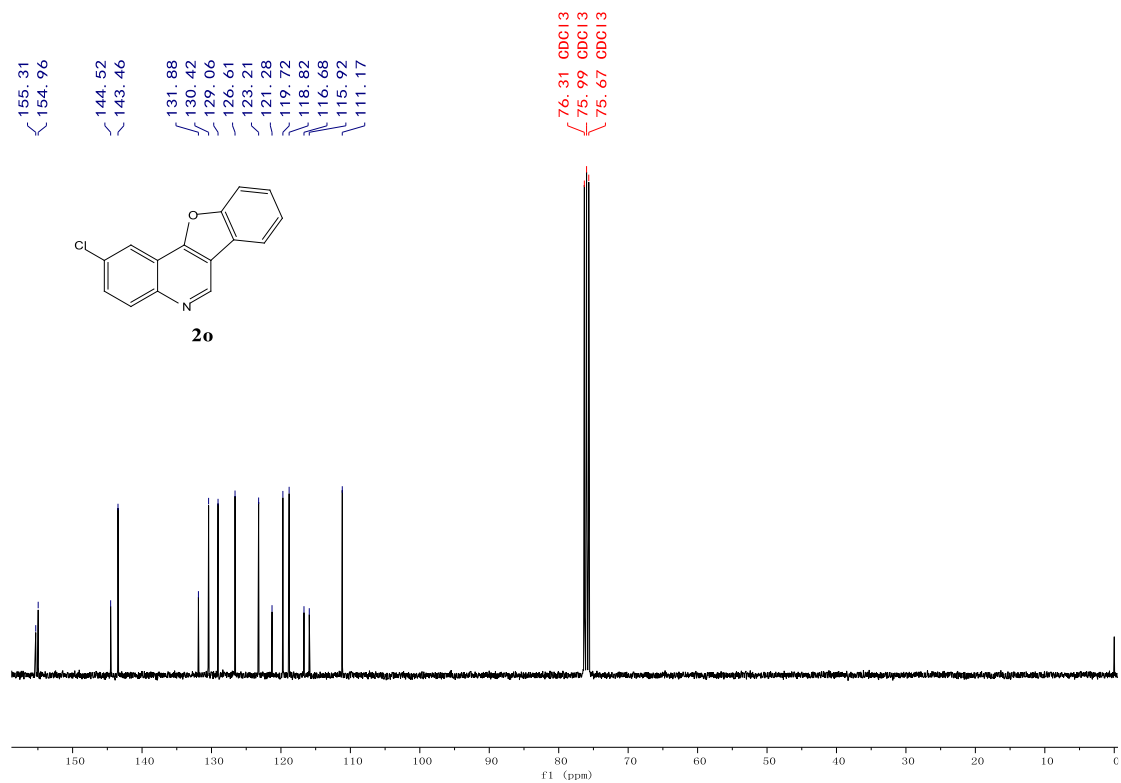

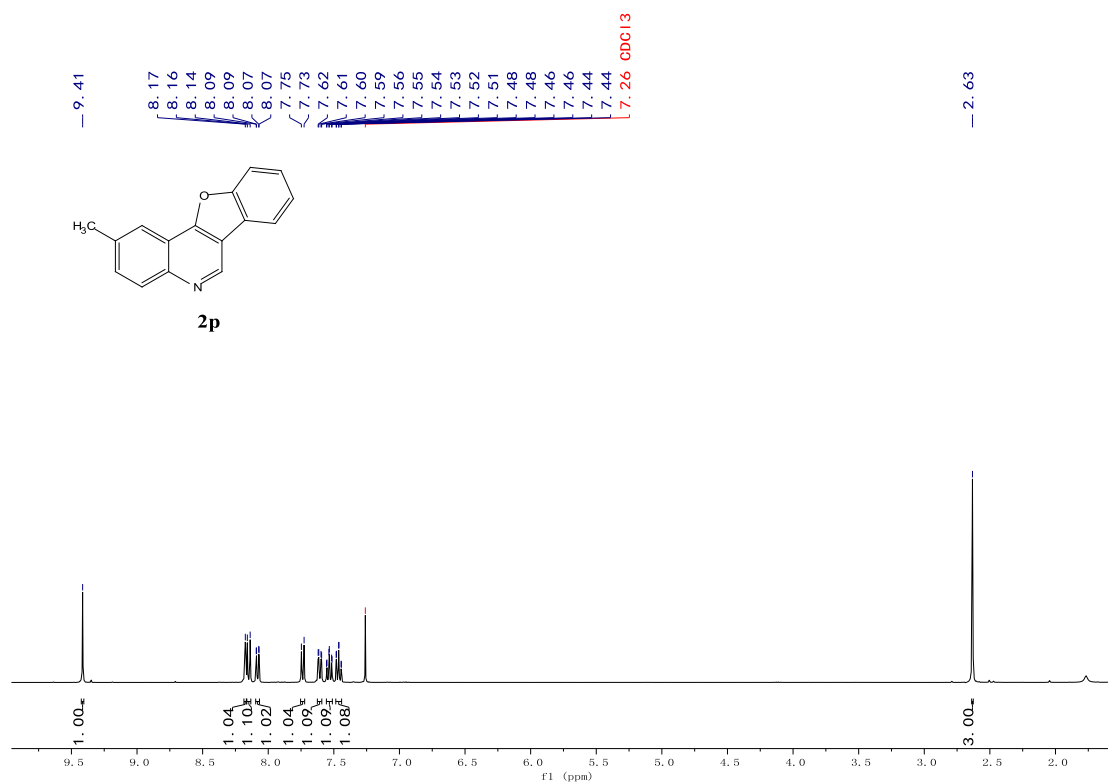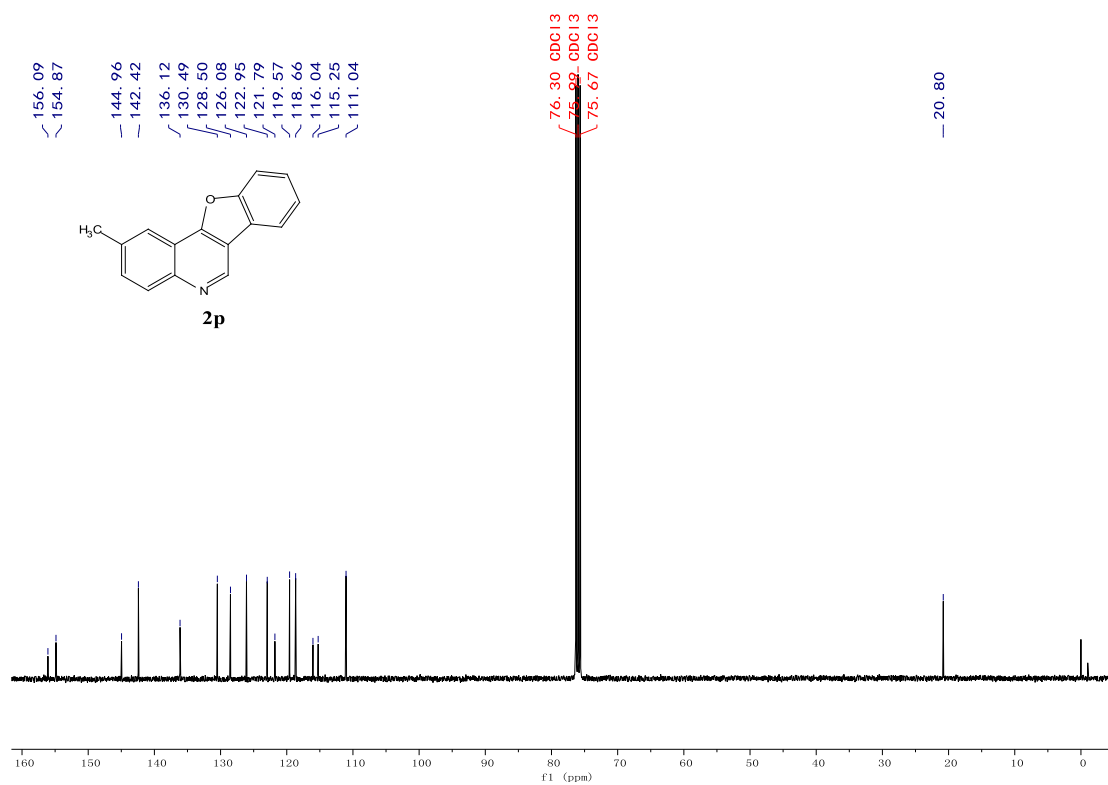

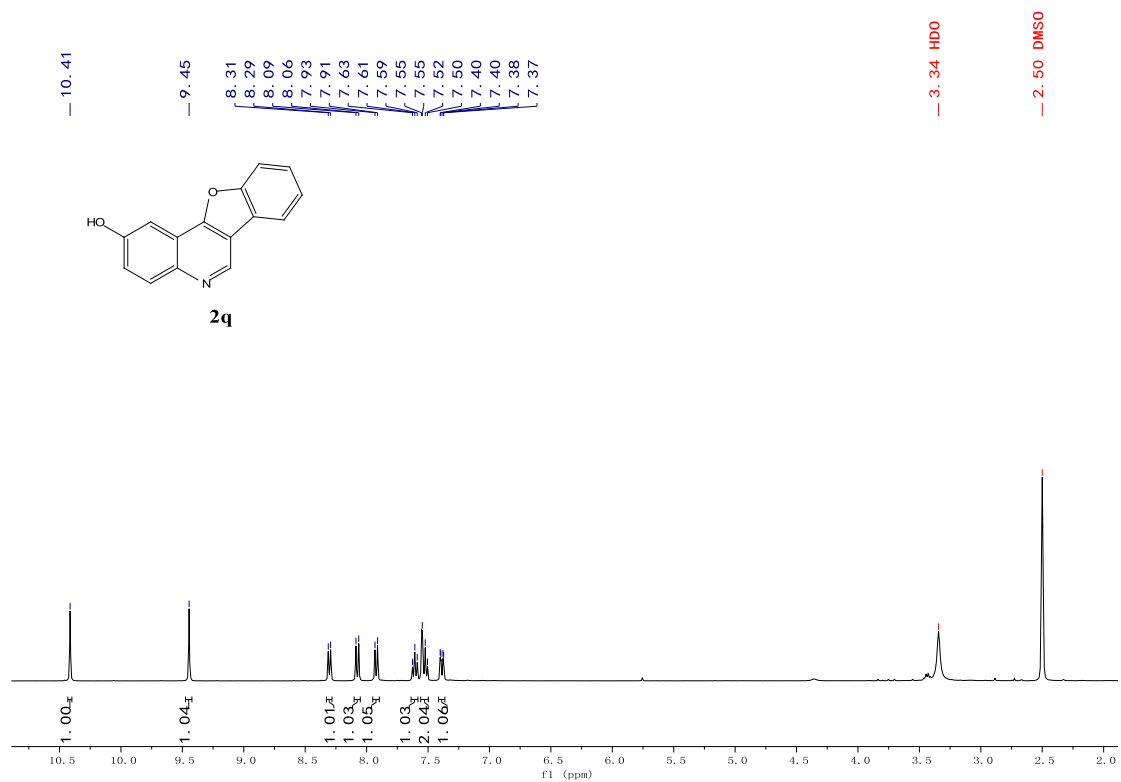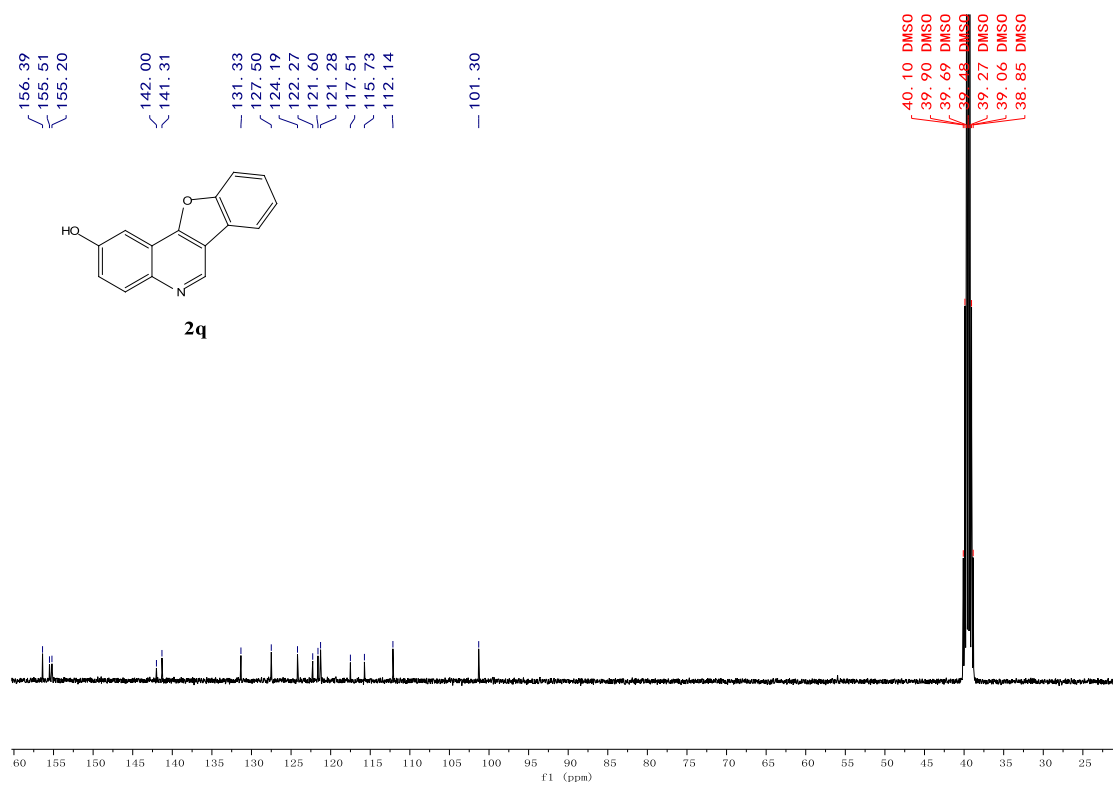

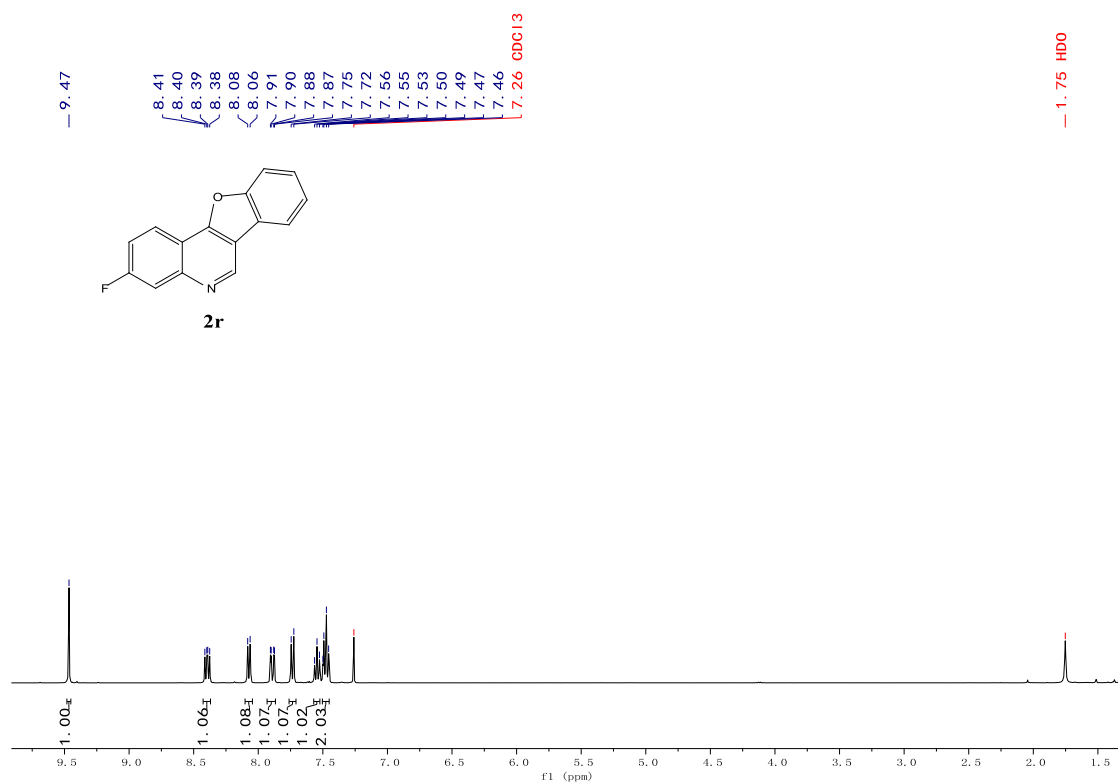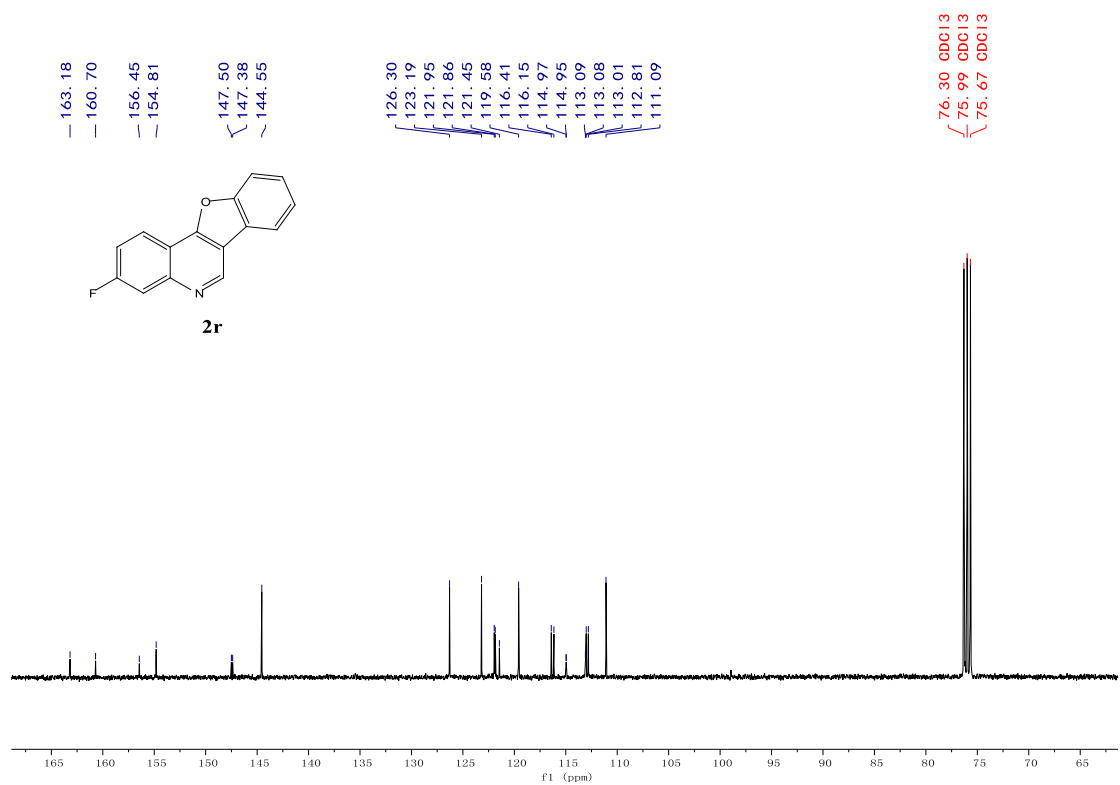

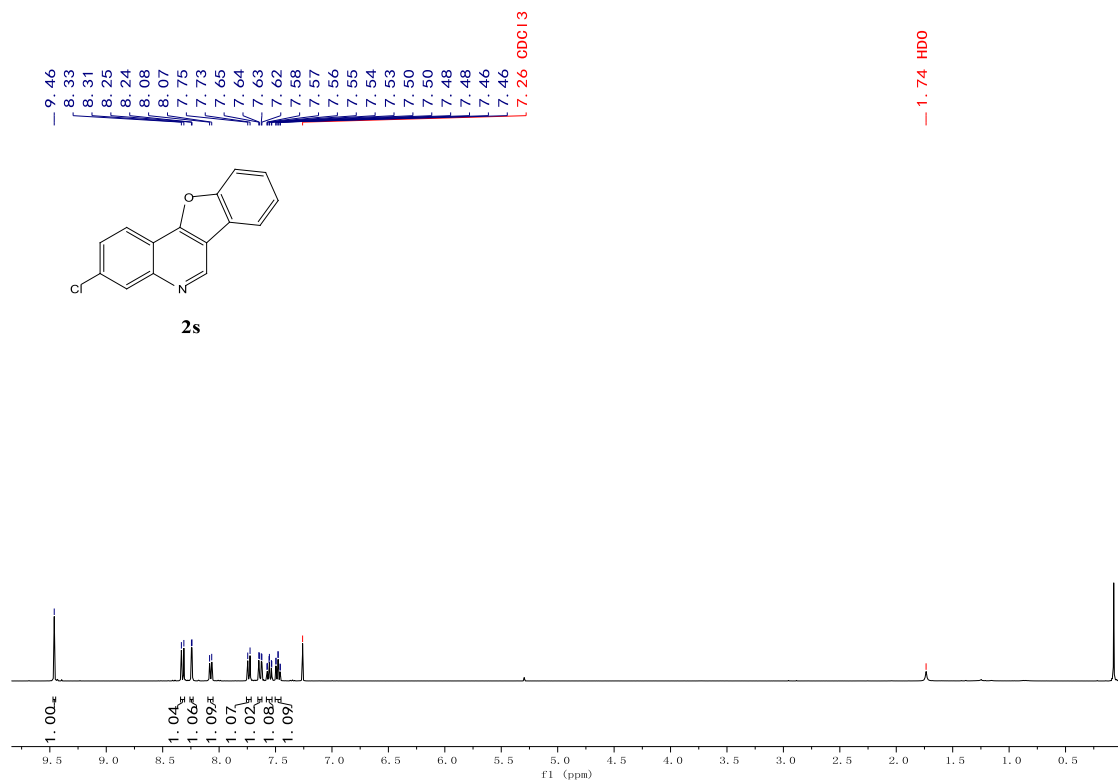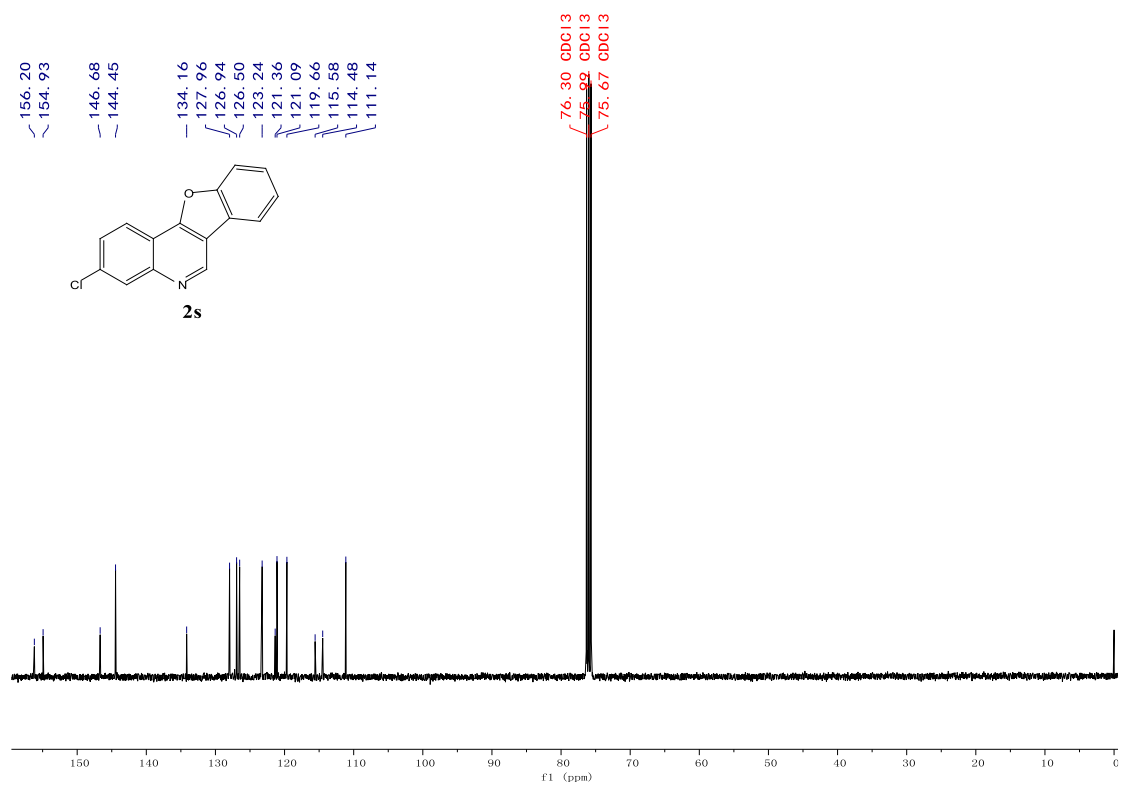

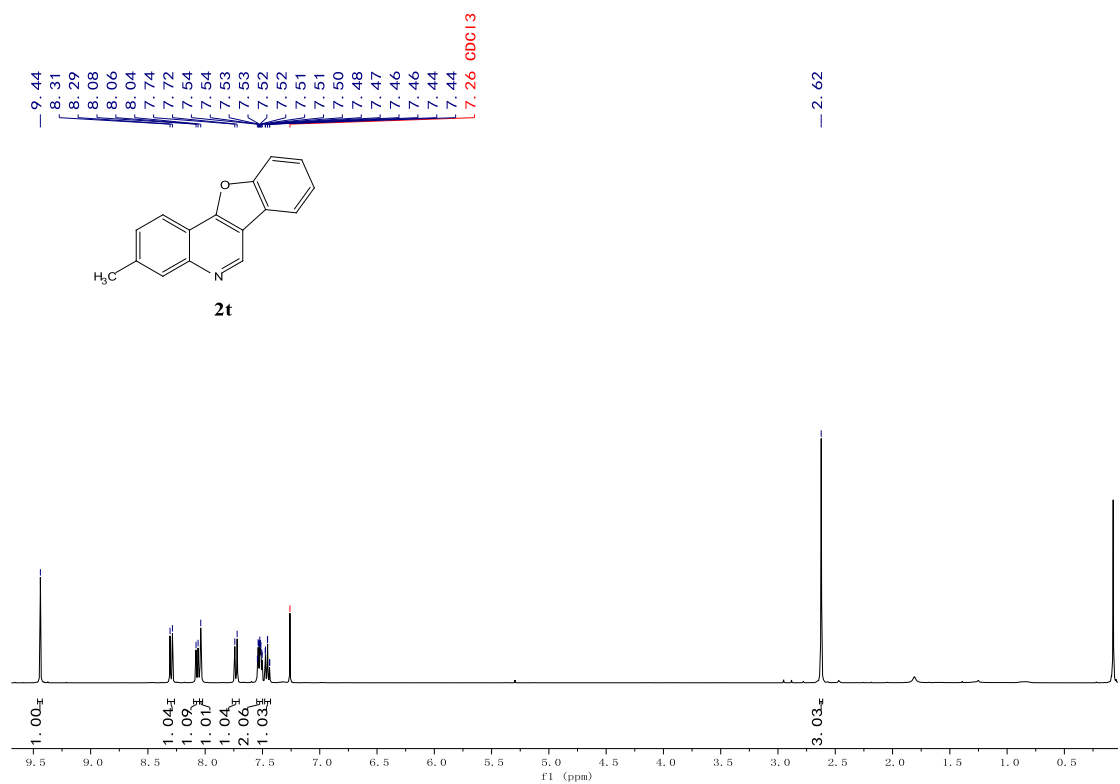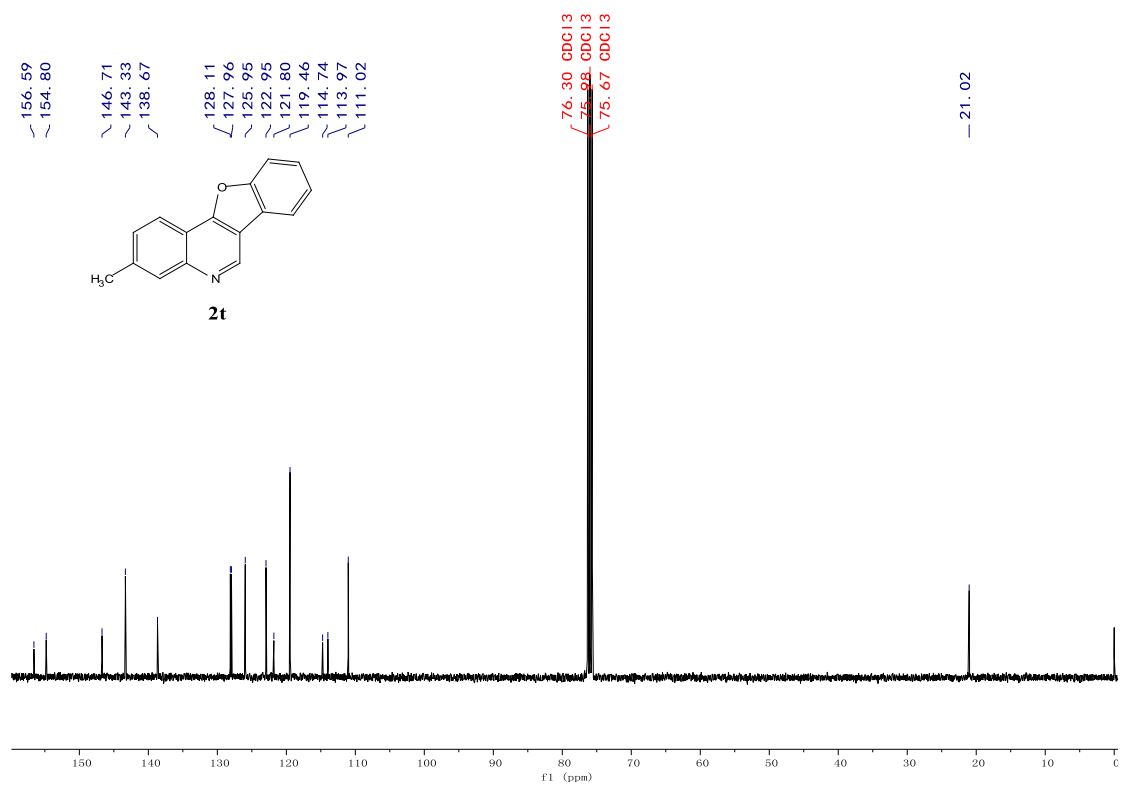

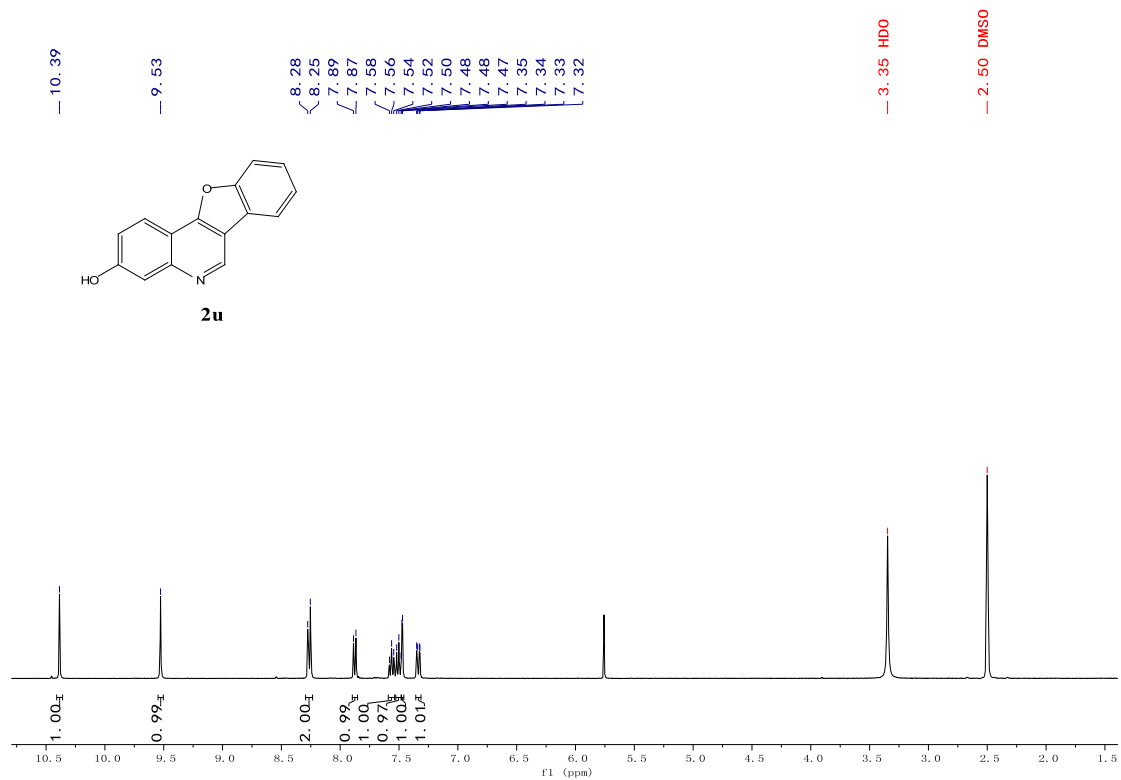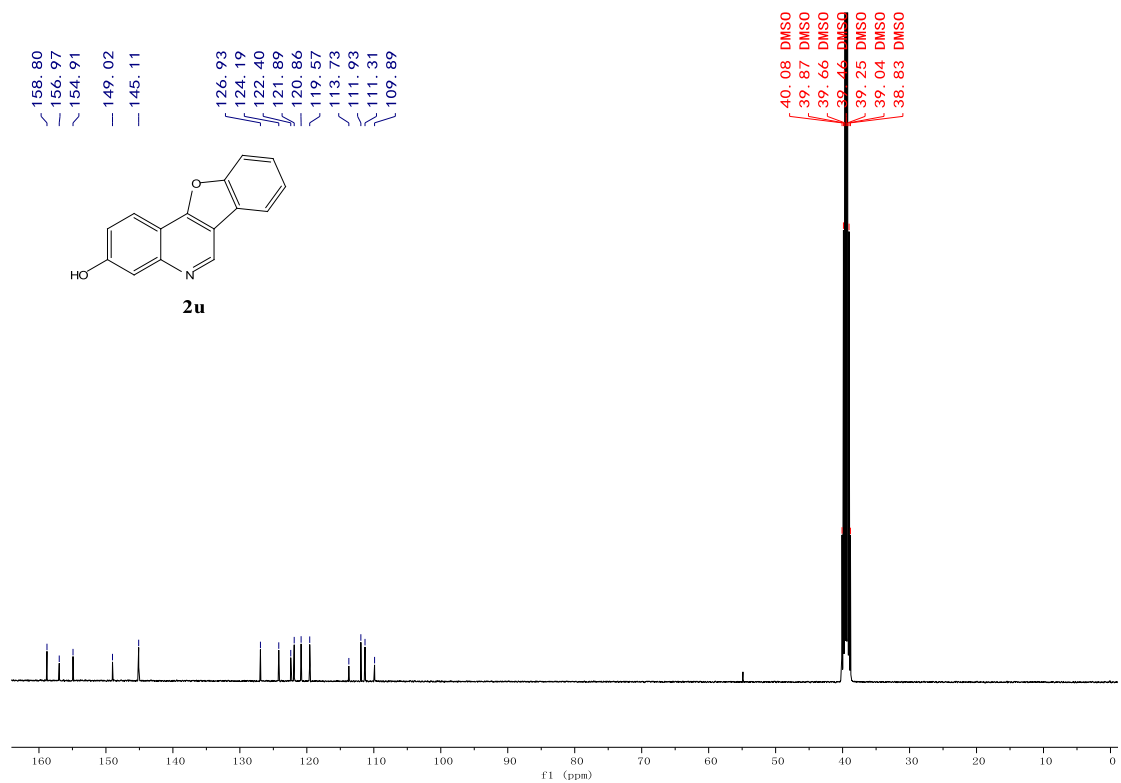

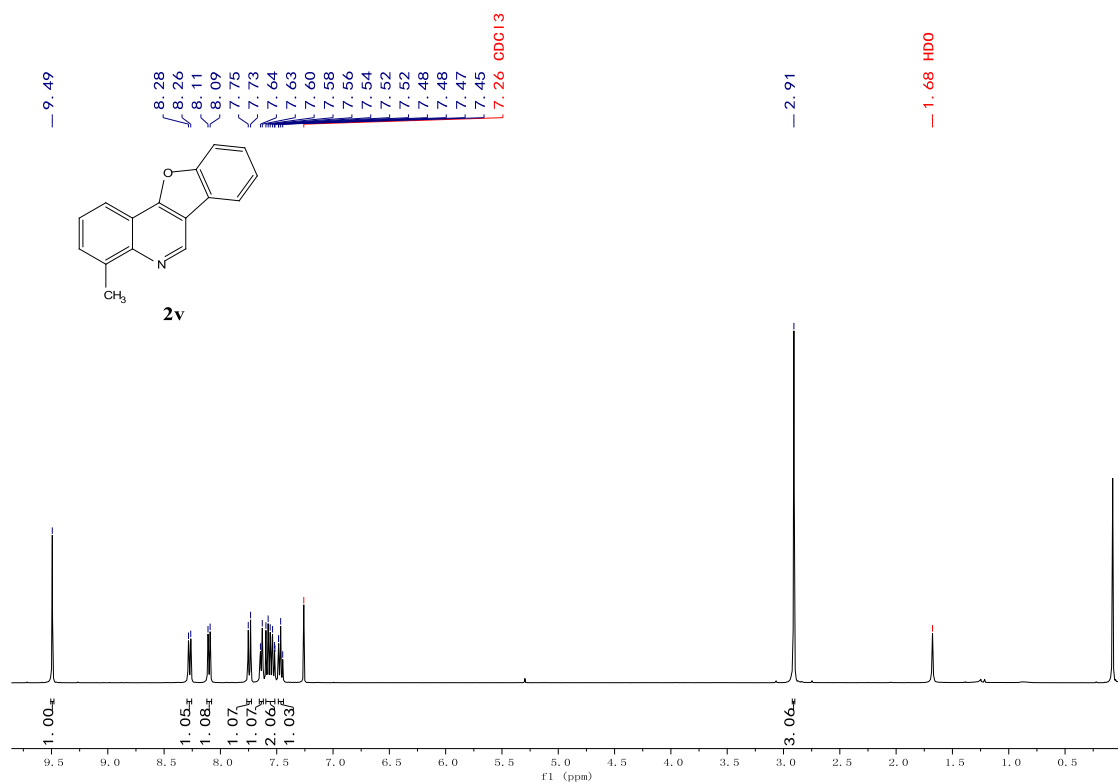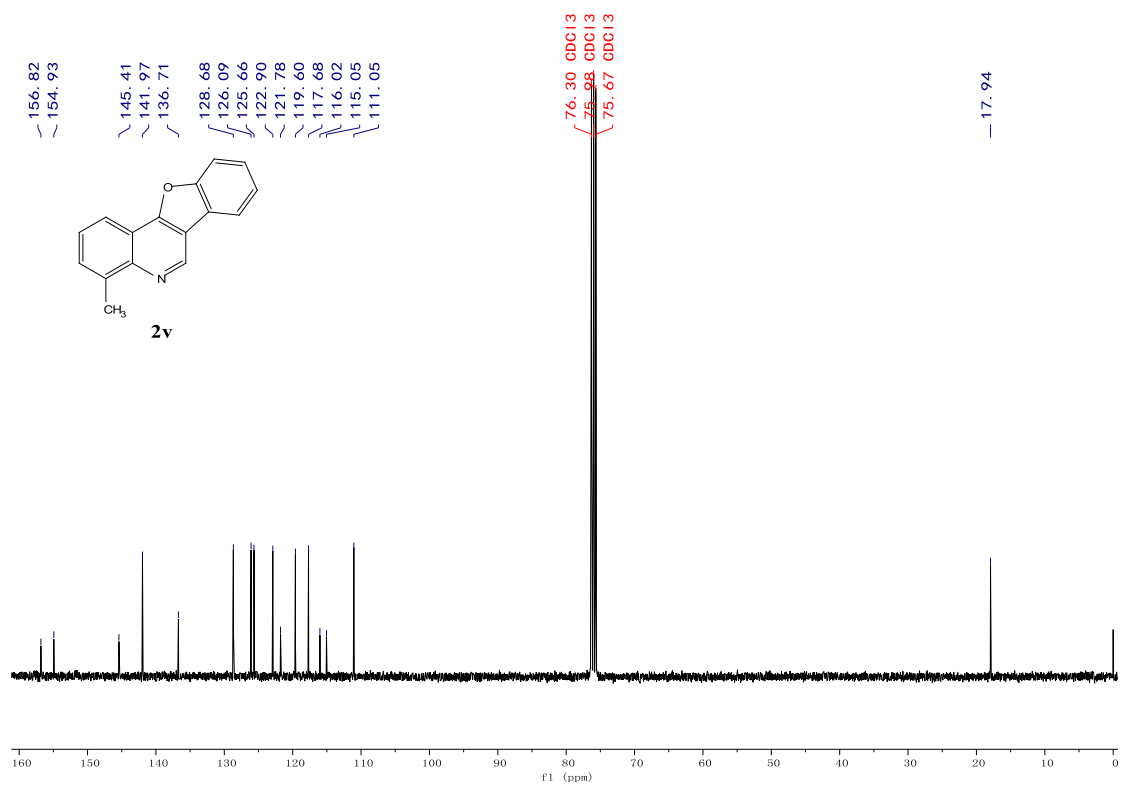

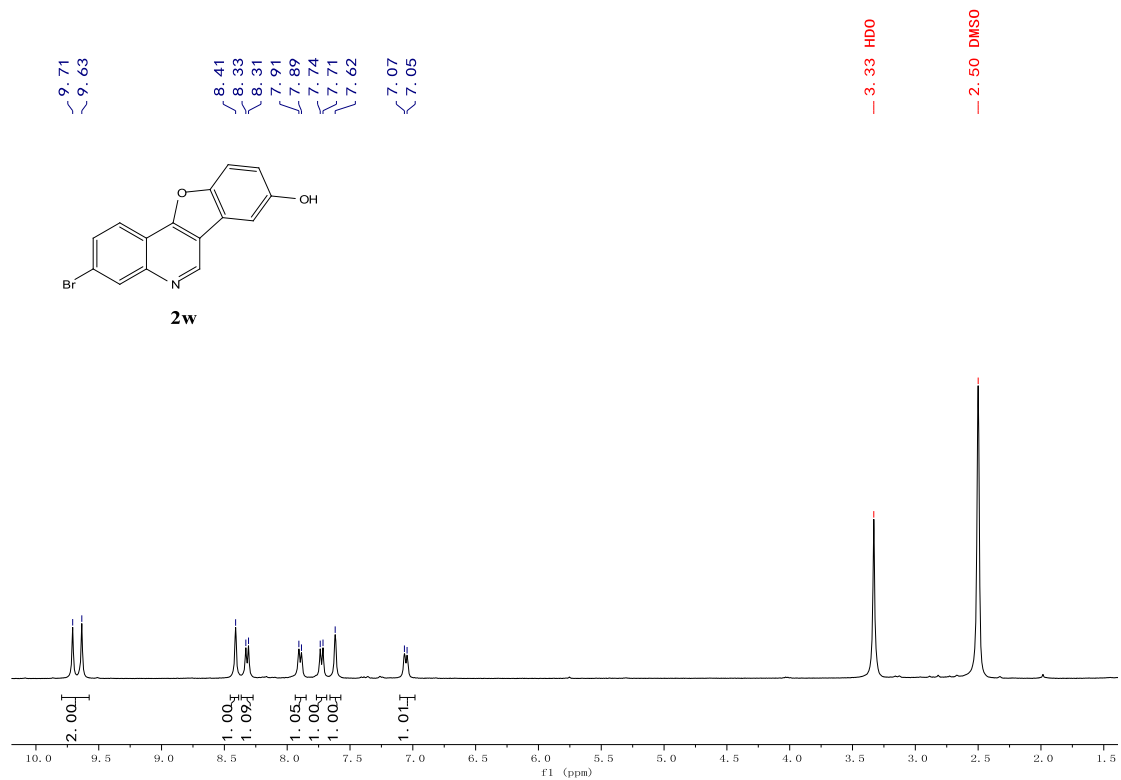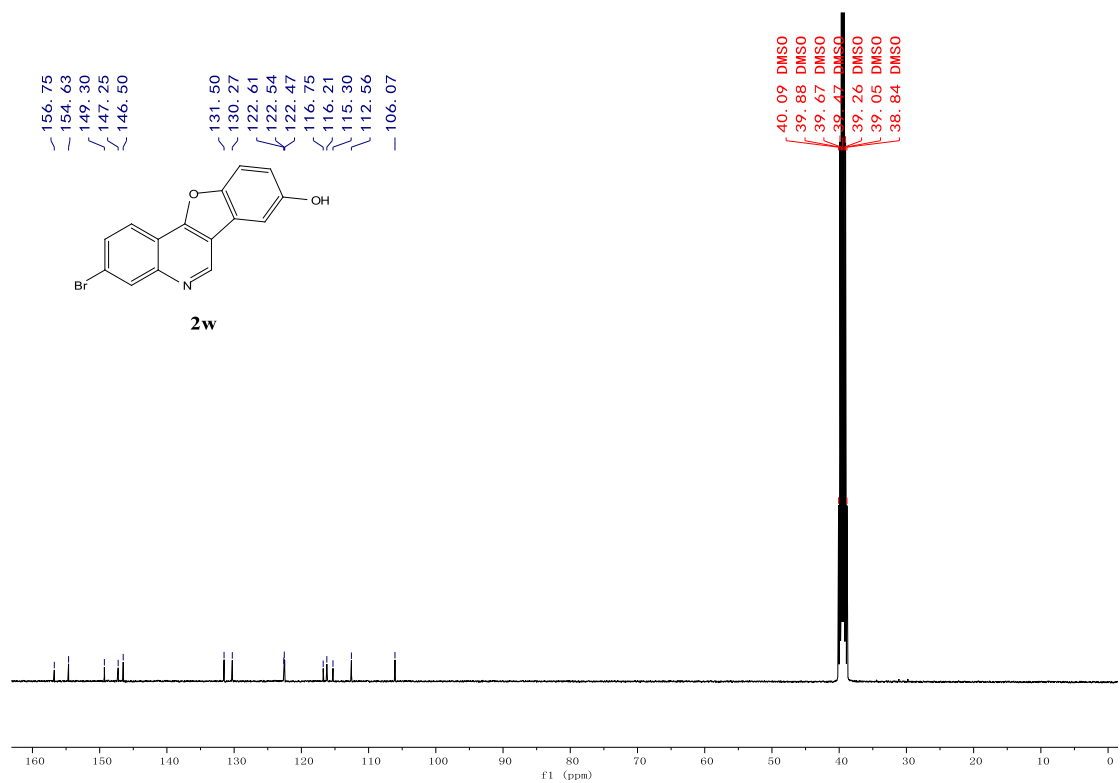

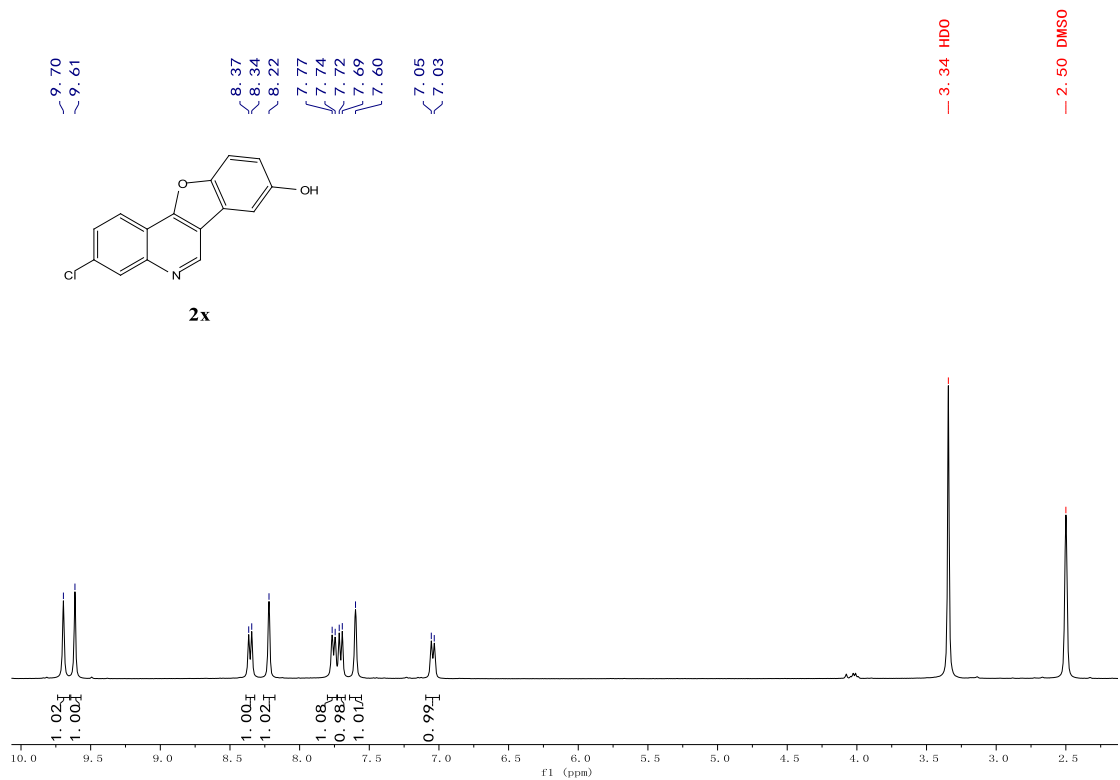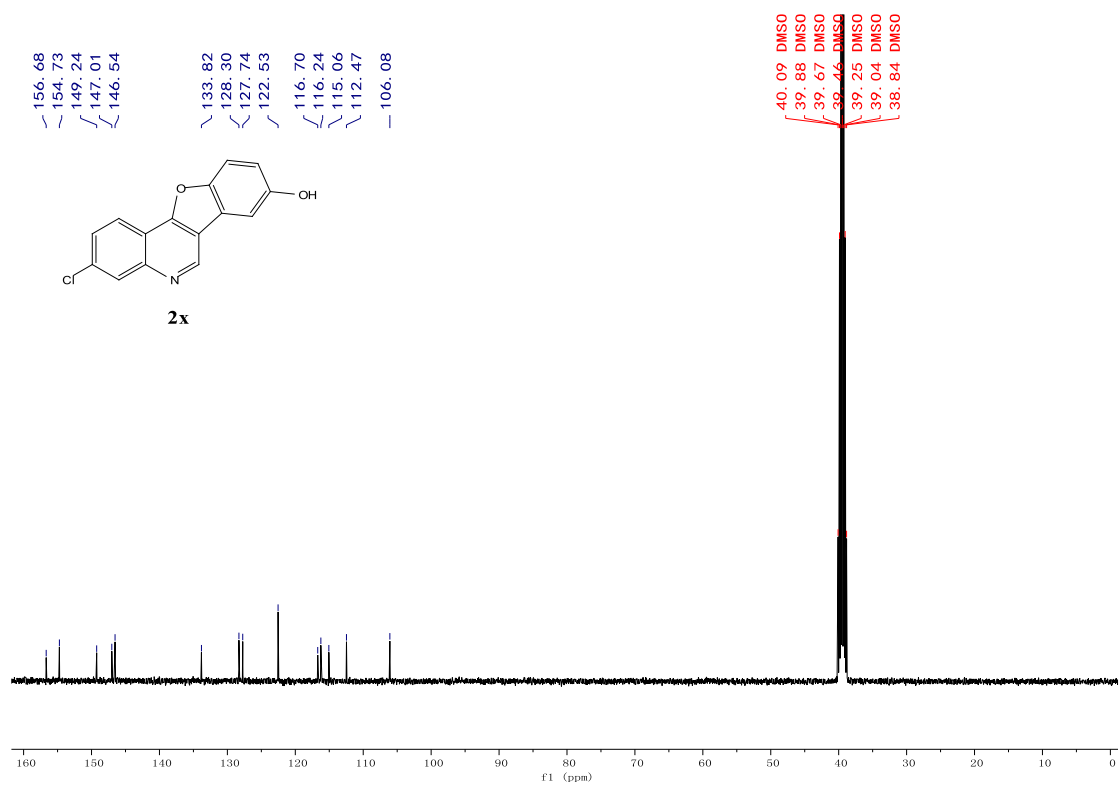

Supplement: s1 [file s1]
